# Supplementary material
Source: ML conference proceedings conference paper supplement (https://openreview.net/forum?id=ldulVsMDDk)
Supplement: supplementary_material [file attachment]

---

# Towards a Better Theoretical Understanding of Independent Subnetwork Training

---

Anonymous Author(s)

Affiliation

Address

email

## Abstract

1 Modern advancements in large-scale machine learning would be impossible without  
2 the paradigm of data-parallel distributed computing. Since distributed computing  
3 with large-scale models imparts excessive pressure on communication channels, a  
4 lot of recent research was directed towards co-designing communication compression  
5 strategies and training algorithms with the goal of reducing communication  
6 costs. While pure data parallelism allows better data scaling, it suffers from poor  
7 model scaling properties. Indeed, compute nodes are severely limited by memory  
8 constraints, preventing further increases in model size. For this reason, the latest  
9 achievements in training giant neural network models rely on some form of model  
10 parallelism as well. In this work, we take a closer theoretical look at Independent  
11 Subnetwork Training (IST), which is a recently proposed and highly effective  
12 technique for solving the aforementioned problems. We identify fundamental  
13 differences between IST and alternative approaches, such as distributed methods  
14 with compressed communication, and provide a precise analysis of its optimization  
15 performance on a quadratic model.

## 16 1 Introduction

17 A huge part of today’s machine learning success drives from the possibility to build more and more  
18 complex models and train them on increasingly larger datasets. This fast progress has become  
19 feasible due to advancements in distributed optimization, which is necessary for proper scaling  
20 when the training data sizes grow [50]. In a typical scenario data parallelism is used for efficiency  
21 which consists of sharding the dataset across computing devices. This allowed very efficient scaling  
22 and accelerating of training moderately sized models by using additional hardware [19]. Though,  
23 such data parallel approach can suffer from communication bottleneck, which sparked a lot of  
24 research on distributed optimization with compressed communication of the parameters between  
25 nodes [3, 27, 38].

### 26 1.1 The need for model parallel

27 Despite the efficiency gains of data parallelism, it has some fundamental limitations when it comes to  
28 scaling up the model size. As the model dimension grows, the amount of memory required to store  
29 and update the parameters also increases, which becomes problematic due to resource constraints  
30 on individual devices. This has led to the development of model parallelism [11, 37], which splits  
31 a large model across multiple nodes, with each node responsible for computations of model parts  
32 [15, 47]. However, naive model parallelism also poses challenges because each node can only update  
33 its portion of the model based on the data it has access to. This creates a need for a very careful  
34 management of communication between devices. Thus, a combination of both data and model  
35 parallelism is often necessary to achieve efficient and scalable training of huge models.

---

**Algorithm 1** Distributed Submodel (Stochastic) Gradient Descent

---

```
1: Parameters: learning rate  $\gamma > 0$ ; sketches  $\mathbf{C}_1, \dots, \mathbf{C}_n$ ; initial model  $x^0 \in \mathbb{R}^d$ 
2: for  $k = 0, 1, 2 \dots$  do
3:   Select submodels  $w_i^k = \mathbf{C}_i^k x^k$  for  $i \in [n]$  and broadcast to all computing nodes
4:   for  $i = 1, \dots, n$  in parallel do
5:     Compute local (stochastic) gradient w.r.t. submodel:  $\mathbf{C}_i^k \nabla f_i(w_i^k)$ 
6:     Take (maybe multiple) gradient descent step  $z_i^+ = w_i^k - \gamma \mathbf{C}_i^k \nabla f_i(w_i^k)$ 
7:     Send  $z_i^+$  to the server
8:   end for
9:   Aggregate/merge received submodels:  $x^{k+1} = \frac{1}{n} \sum_{i=1}^n z_i^+$ 
10: end for
```

---

36 **IST.** Independent Subnetwork Training (IST) is a technique which suggests dividing the neural  
37 network into smaller independent sub-parts, training them in a distributed parallel fashion and then  
38 aggregating the results to update the weights of the whole model. According to IST, every subnetwork  
39 is operational on its own, has fewer parameters than the full model, and this not only reduces the load  
40 on computing nodes but also results in faster synchronization. A generalized analog of the described  
41 method is formalized as an iterative procedure in Algorithm 1. This paradigm was pioneered by  
42 [45] for networks with fully-connected layers and was later extended to ResNets [14] and Graph  
43 architectures [43]. Previous experimental studies have shown that IST is a very promising approach  
44 for various applications as it allows to effectively combine data with model parallelism and train  
45 larger models with limited compute. In addition, [28] performed theoretical analysis of IST for  
46 overparameterized single hidden layer neural networks with ReLU activations. The idea of IST was  
47 also recently extended to the federated setting via an asynchronous distributed dropout [13] technique.

48 **Federated Learning.** Another important setting when the data is distributed (due to privacy reasons)  
49 is Federated Learning [22, 27, 31]. In this scenario computing devices are often heterogeneous and  
50 more resource-constrained [5] (e.g. mobile phones) in comparison to data-center setting. Such  
51 challenges prompted extensive research efforts into selecting smaller and more efficient submodels  
52 for local on-device training [2, 6, 8, 12, 20, 21, 29, 35, 42, 44]. Many of these works propose  
53 approaches to adapt submodels, often tailored to specific neural network architectures, based on  
54 the capabilities of individual clients for various machine learning tasks. However, there is a lack of  
55 comprehension regarding the theoretical properties of these methods.

## 56 1.2 Summary of contributions

57 When reviewing the literature, we have found that a rigorous understanding of IST convergence  
58 virtually does not exist, which motivates our work. The main contributions of this paper include

- 59 • A novel approach to analyzing distributed methods that combine data and model parallelism  
60 by operating with sparse submodels for a quadratic model.
- 61 • The first analysis of independent subnetwork training in homogeneous and heterogeneous  
62 scenarios without restrictive assumptions on gradient estimators.
- 63 • Identification of settings when IST can optimize very efficiently or converge not to the  
64 optimal solution but only to an irreducible neighborhood which is also tightly characterized.
- 65 • Experimental validation of the proposed theory through carefully designed illustrative  
66 experiments. Due to space limitations, the results (and proofs) are provided in the Appendix.

## 67 2 Formalism and setup

68 We consider the standard optimization formulation of distributed/federated learning problem [41],

$$\min_{x \in \mathbb{R}^d} \left[ f(x) := \frac{1}{n} \sum_{i=1}^n f_i(x) \right], \quad (1)$$

69 where  $n$  is the number of clients/workers, each  $f_i : \mathbb{R}^d \rightarrow \mathbb{R}$  represents the loss of the model  
70 parameterized by vector  $x \in \mathbb{R}^d$  on the data of client  $i$ .

71 A typical Stochastic Gradient Descent (SGD) type method for solving this problem has the form

$$x^{k+1} = x^k - \gamma g^k, \quad g^k = \frac{1}{n} \sum_{i=1}^n g_i^k, \quad (2)$$

72 where  $\gamma > 0$  is a stepsize and  $g_i^k$  is a suitably constructed estimator of  $\nabla f_i(x^k)$ . In the distributed  
73 setting, computation of gradient estimators  $g_i^k$  is typically performed by clients, sent to the server,  
74 which subsequently performs aggregation via averaging  $g^k = \frac{1}{n} \sum_{i=1}^n g_i^k$ . The result is then used to  
75 update the model  $x^{k+1}$  via a gradient-type method (2), and at the next iteration the model is broadcast  
76 back to the clients. The process is repeated iteratively until a model of suitable qualities is found.

77 One of the main techniques used to accelerate distributed training is lossy *communication compression*  
78 [3, 27, 38]. It suggests applying a (possibly randomized) lossy compression mapping  $\mathcal{C}$  to a  
79 vector/matrix/tensor  $x$  before it is transmitted. This saves bits sent per every communication round  
80 at the cost of transmitting a less accurate estimate  $\mathcal{C}(x)$  of  $x$ . The error caused by this routine also  
81 causes convergence issues, and to the best of our knowledge, convergence of IST-based techniques is  
82 for this reason not yet understood.

83 **Definition 1** (Unbiased compressor). *A randomized mapping  $\mathcal{C} : \mathbb{R}^d \rightarrow \mathbb{R}^d$  is an **unbiased compression**  
84 **operator** ( $\mathcal{C} \in \mathbb{U}(\omega)$  for brevity) if for some  $\omega \geq 0$  and  $\forall x \in \mathbb{R}^d$*

$$\mathbb{E}[\mathcal{C}(x)] = x, \quad \mathbb{E}[\|\mathcal{C}(x) - x\|^2] \leq \omega \|x\|^2. \quad (3)$$

85 A notable example of a mapping from this class is the *random sparsification* (Rand-q for  $q \in$   
86  $\{1, \dots, d\}$ ) operator defined by

$$\mathcal{C}_{\text{Rand-q}}(x) := \mathbf{C}_q x = \frac{d}{q} \sum_{i \in S} e_i e_i^\top x, \quad (4)$$

87 where  $e_1, \dots, e_d \in \mathbb{R}^d$  are standard unit basis vectors in  $\mathbb{R}^d$ , and  $S$  is a random subset of  $[d] :=$   
88  $\{1, \dots, d\}$  sampled from the uniform distribution on the all subsets of  $[d]$  with cardinality  $q$ . Rand-q  
89 belongs to  $\mathbb{U}(d/q - 1)$ , which means that the more elements are “dropped” (lower  $q$ ), the higher is  
90 the variance  $\omega$  of the compressor.

91 In this work, we are mainly interested in a somewhat more general class of operators than mere  
92 sparsifiers. In particular, we are interested in compressing via the application of random matrices, i.e.,  
93 via *sketching*. A sketch  $\mathbf{C}_i^k \in \mathbb{R}^{d \times d}$  can be used to represent submodel computations in the following  
94 way:

$$g_i^k := \mathbf{C}_i^k \nabla f_i(\mathbf{C}_i^k x^k), \quad (5)$$

95 where we require  $\mathbf{C}_i^k$  to be a symmetric positive semidefinite matrix. Such gradient estimate  
96 corresponds to computing the local gradient with respect to a sparse submodel model  $\mathbf{C}_i^k x^k$ , and  
97 additionally sketching the resulting gradient with the same matrix  $\mathbf{C}_i^k$  to guarantee that the resulting  
98 update lies in the lower-dimensional subspace.

99 Using this notion, Algorithm 1 (with one local gradient step) can be represented in the following form

$$x^{k+1} = \frac{1}{n} \sum_{i=1}^n [\mathbf{C}_i^k x^k - \gamma \mathbf{C}_i^k \nabla f_i(\mathbf{C}_i^k x^k)], \quad (6)$$

which is equivalent to the SGD-type update (2) when *perfect reconstruction* property holds

$$\mathbf{C}^k := \frac{1}{n} \sum_{i=1}^n \mathbf{C}_i^k = \mathbf{I},$$

100 where  $\mathbf{I}$  is the identity matrix (with probability one). This property holds for a specific class of  
101 compressors that are particularly useful for capturing the concept of an *independent* subnetwork  
102 partition.

103 **Definition 2** (Permutation sketch). *Assume that model size is greater than number of clients  $d \geq n$   
104 and  $d = qn$ , where  $q \geq 1$  is an integer<sup>1</sup>. Let  $\pi = (\pi_1, \dots, \pi_d)$  be a random permutation of  $[d]$ . Then  
105 for all  $x \in \mathbb{R}^d$  and each  $i \in [n]$  we define *Perm-q operator**

$$\mathbf{C}_i := n \cdot \sum_{j=q(i-1)+1}^{qi} e_{\pi_j} e_{\pi_j}^\top. \quad (7)$$

<sup>1</sup>While this condition may look restrictive it naturally holds for distributed learning in a data-center setting. For other scenarios [40] generalized it for  $n \geq d$  and block permutation case.

106 Perm-q is unbiased and can be conveniently used for representing (non-overlapping) structured  
 107 decomposition of the model such that every client  $i$  is responsible for computations over a submodel  
 108  $\mathbf{C}_i x^k$ .

109 Our convergence analysis relies on assumption previously used for coordinate descent type methods.

110 **Assumption 1** (Matrix smoothness). *A differentiable function  $f : \mathbb{R}^d \rightarrow \mathbb{R}$  is  $\mathbf{L}$ -smooth, if there*  
 111 *exists a positive semi-definite matrix  $\mathbf{L} \in \mathbb{R}^{d \times d}$  such that*

$$f(x+h) \leq f(x) + \langle \nabla f(x), h \rangle + \frac{1}{2} \langle \mathbf{L}h, h \rangle, \quad \forall x, h \in \mathbb{R}^d. \quad (8)$$

112 Standard  $L$ -smoothness condition is obtained as a special case of (8) for  $\mathbf{L} = L \cdot \mathbf{I}$ .

## 113 2.1 Issues with existing approaches

114 Consider the simplest gradient type method with compressed model in the single node setting

$$x^{k+1} = x^k - \gamma \nabla f(\mathcal{C}(x^k)). \quad (9)$$

115 Algorithms belonging to this family require a different analysis in comparison to SGD [16, 18],  
 116 Distributed Compressed Gradient Descent [3, 26] and Randomized Coordinate Descent [34, 36] type  
 117 methods because the gradient estimator is no longer unbiased

$$\mathbb{E} [\nabla f(\mathcal{C}(x))] \neq \nabla f(x) = \mathbb{E} [\mathcal{C}(\nabla f(x))]. \quad (10)$$

118 That is why such kind of algorithms are harder to analyze. So, prior results for *unbiased* SGD [25]  
 119 can not be directly reused. Furthermore, the nature of the bias in this type of gradient estimator does  
 120 not exhibit additive (zero-mean) noise, thereby preventing the application of previous analyses for  
 121 biased SGD [1].

122 An assumption like bounded stochastic gradient norm extensively used in previous works [30, 48]  
 123 hinders an accurate understanding of such methods. This assumption hides the fundamental difficulty  
 124 of analyzing biased gradient estimator:

$$\mathbb{E} [\|\nabla f(\mathcal{C}(x))\|^2] \leq G \quad (11)$$

125 and may not hold even for quadratic functions  $f(x) = x^\top \mathbf{A}x$ . In addition, in the distributed  
 126 setting such condition can result in vacuous bounds [23] as it does not allow to accurately capture  
 127 heterogeneity.

## 128 3 Results in the interpolation case

129 To conduct a thorough theoretical analysis of methods that combine data with model parallelism,  
 130 we simplify the algorithm and problem setting to isolate the unique effects of this approach. The  
 131 following considerations are made:

- 132 (1) We assume that every node  $i$  computes the true gradient at the submodel  $\mathbf{C}_i \nabla f_i(\mathbf{C}_i x^k)$ .
- 133 (2) A notable difference from the original IST algorithm 1 is that workers perform single  
 134 gradient descent step (or just gradient computation).
- 135 (3) Finally, we consider a special case of quadratic model (12) as a loss function (1).

136 Condition (1) is mainly for the sake of simplicity and clarity of exposition and can be potentially  
 137 generalized to stochastic gradient computations. (2) is imposed because local steps did not bring  
 138 any theoretical efficiency improvements for heterogeneous settings until very recently [32]. And  
 139 even then, only with the introduction of additional control variables, which goes against resource-  
 140 constrained device setting. The reason behind (3) is that despite the seeming simplicity quadratic  
 141 problem has been used extensively to study properties of neural networks [46, 49]. Moreover, it is a  
 142 non-trivial model which allows to understand complex optimization algorithms [4, 10, 17]. It serves  
 143 as a suitable problem for observing complex phenomena and providing theoretical insights, which  
 144 can also be observed in practical scenarios.

145 Having said that we consider a special case of problem (1) for symmetric matrices  $\mathbf{L}_i$

$$f(x) = \frac{1}{n} \sum_{i=1}^n f_i(x), \quad f_i(x) \equiv \frac{1}{2} x^\top \mathbf{L}_i x - x^\top \mathbf{b}_i. \quad (12)$$

146 In this case,  $f(x)$  is  $\bar{\mathbf{L}}$ -smooth, and  $\nabla f(x) = \bar{\mathbf{L}}x - \bar{\mathbf{b}}$ , where  $\bar{\mathbf{L}} = \frac{1}{n} \sum_{i=1}^n \mathbf{L}_i$  and  $\bar{\mathbf{b}} := \frac{1}{n} \sum_{i=1}^n \mathbf{b}_i$ .

### 147 3.1 No linear term: problems and solutions

148 First, let us examine the case of  $\mathbf{b}_i \equiv 0$ , which we call interpolation for quadratics, and perform the  
149 analysis for general sketches  $\mathbf{C}_i^k$ . In this case the gradient estimator (2) takes the form

$$g^k = \frac{1}{n} \sum_{i=1}^n \mathbf{C}_i^k \nabla f_i(\mathbf{C}_i^k x^k) = \frac{1}{n} \sum_{i=1}^n \mathbf{C}_i^k \mathbf{L}_i \mathbf{C}_i^k x^k = \bar{\mathbf{B}}^k x^k \quad (13)$$

150 where  $\bar{\mathbf{B}}^k := \frac{1}{n} \sum_{i=1}^n \mathbf{C}_i^k \mathbf{L}_i \mathbf{C}_i^k$ . We prove the following result for a method with such an estimator.

151 **Theorem 1.** Consider the method (2) with estimator (13) for a quadratic problem (12) with  $\bar{\mathbf{L}} \succ 0$   
152 and  $\mathbf{b}_i \equiv 0$ . Then if  $\bar{\mathbf{W}} := \frac{1}{2} \mathbb{E} [\bar{\mathbf{L}} \bar{\mathbf{B}}^k + \bar{\mathbf{B}}^k \bar{\mathbf{L}}] \succeq 0$  and there exists constant  $\theta > 0$ :

$$\mathbb{E} [\bar{\mathbf{B}}^k \bar{\mathbf{L}} \bar{\mathbf{B}}^k] \preceq \theta \bar{\mathbf{W}}, \quad (14)$$

153 and the step size is chosen as  $0 < \gamma \leq \frac{1}{\theta}$ , the iterates satisfy

$$\frac{1}{K} \sum_{k=0}^{K-1} \mathbb{E} [\|\nabla f(x^k)\|_{\bar{\mathbf{L}}^{-1} \bar{\mathbf{W}} \bar{\mathbf{L}}^{-1}}^2] \leq \frac{2(f(x^0) - \mathbb{E}[f(x^K)])}{\gamma K}, \quad (15)$$

154 and

$$\mathbb{E} [\|x^k - x^*\|_{\bar{\mathbf{L}}}^2] \leq \left(1 - \gamma \lambda_{\min} \left(\bar{\mathbf{L}}^{-\frac{1}{2}} \bar{\mathbf{W}} \bar{\mathbf{L}}^{-\frac{1}{2}}\right)\right)^k \|x^0 - x^*\|_{\bar{\mathbf{L}}}^2. \quad (16)$$

155 This theorem establishes an  $\mathcal{O}(1/K)$  convergence rate with constant step size up to a stationary point  
156 and linear convergence for the expected distance to the optimum. Note that we employ weighted  
157 norms in our analysis, as the considered class of loss functions satisfies the matrix  $\bar{\mathbf{L}}$ -smoothness  
158 Assumption 1. The use of standard Euclidean distance may result in loose bounds that do not recover  
159 correct rates for special cases like Gradient Descent.

160 It is important to highlight that inequality (14) may not hold (for any  $\theta > 0$ ) in the general case  
161 as the matrix  $\bar{\mathbf{W}}$  is not guaranteed to be positive (semi-)definite in the case of general sampling.  
162 The intuition behind it is that arbitrary sketches  $\mathbf{C}_i^k$  can result in gradient estimator  $g^k$ , which is  
163 misaligned with the true gradient  $\nabla f(x^k)$ . Specifically, the inner product  $\langle \nabla f(x^k), g^k \rangle$  can be  
164 negative, and there is no expected descent after one step.

165 Next, we give examples of samplings for which the inequality (14) can be satisfied.

166 **1. Identity.** Consider  $\mathbf{C}_i \equiv \mathbf{I}$ . Then  $\bar{\mathbf{B}}^k = \bar{\mathbf{L}}$ ,  $\bar{\mathbf{B}}^k \bar{\mathbf{L}} \bar{\mathbf{B}}^k = \bar{\mathbf{L}}^3$ ,  $\bar{\mathbf{W}} = \bar{\mathbf{L}}^2 \succ 0$  and hence (14) is  
167 satisfied for  $\theta = \lambda_{\max}(\bar{\mathbf{L}})$ . So, (15) says that if we choose  $\gamma = \frac{1}{\theta}$ , then

$$\frac{1}{K} \sum_{k=0}^{K-1} \|\nabla f(x^k)\|_{\mathbf{I}}^2 \leq \frac{2\lambda_{\max}(\bar{\mathbf{L}})(f(x^0) - f(x^K))}{K},$$

168 which exactly matches the rate of Gradient Descent in the non-convex setting. As for iterates  
169 convergence, the rate in (16) is  $\lambda_{\max}(\bar{\mathbf{L}})/\lambda_{\min}(\bar{\mathbf{L}})$  corresponding to precise Gradient Descent result for  
170 strongly convex functions.

**2. Permutation.** Assume  $n = d^2$  and the use of Perm-1 (special case of Definition 2) sketch  
 $\mathbf{C}_i^k = n e_{\pi_i^k} e_{\pi_i^k}^\top$ , where  $\pi^k = (\pi_1^k, \dots, \pi_n^k)$  is a random permutation of  $[n]$ . Then

$$\mathbb{E} [\bar{\mathbf{B}}^k] = \frac{1}{n} \sum_{i=1}^n n^2 \mathbb{E} [\mathbf{C}_i^k \mathbf{L}_i \mathbf{C}_i^k] = \frac{1}{n} \sum_{i=1}^n n \text{Diag}(\mathbf{L}_i) = \sum_{i=1}^n \mathbf{D}_i = n \bar{\mathbf{D}},$$

<sup>2</sup>This is done mainly for simplifying the presentation. Results can be generalized to the case of  $n \neq d$  in the similar way as done in [40] which can be found in the Appendix.

171 where  $\bar{\mathbf{D}} := \frac{1}{n} \sum_{i=1}^n \mathbf{D}_i$ ,  $\mathbf{D}_i := \text{Diag}(\mathbf{L}_i)$ . Then inequality (14) leads to

$$n \bar{\mathbf{D}} \bar{\mathbf{L}} \bar{\mathbf{D}} \preceq \frac{\theta}{2} (\bar{\mathbf{L}} \bar{\mathbf{D}} + \bar{\mathbf{D}} \bar{\mathbf{L}}), \quad (17)$$

172 which may not always hold as  $\bar{\mathbf{L}} \bar{\mathbf{D}} + \bar{\mathbf{D}} \bar{\mathbf{L}}$  is not guaranteed to be positive definite even in case of  
 173  $\bar{\mathbf{L}} \succ 0$ . However, such kind of condition can be enforced via a slight modification of permutation  
 174 sketches  $\{\tilde{\mathbf{C}}_i\}_{i=1}^n$ , which is done in Section 3.1.2. The limitation of such an approach is that  
 175 compressors  $\tilde{\mathbf{C}}_i$  become no longer unbiased.

176 **Remark 1.** Matrix  $\bar{\mathbf{W}}$  in case of permutation sketches may not be positive-definite. Consider the  
 177 following homogeneous ( $\mathbf{L}_i \equiv \mathbf{L}$ ) two-dimensional problem example

$$\mathbf{L} = \begin{bmatrix} a & c \\ c & b \end{bmatrix}. \quad (18)$$

178 Then

$$\bar{\mathbf{W}} = \frac{1}{2} [\bar{\mathbf{L}} \bar{\mathbf{D}} + \bar{\mathbf{D}} \bar{\mathbf{L}}] = \begin{bmatrix} a^2 & c(a+b)/2 \\ c(a+b)/2 & b^2 \end{bmatrix}, \quad (19)$$

179 which for  $c > \frac{2ab}{a+b}$  has  $\det(\bar{\mathbf{W}}) < 0$ , and thus  $\bar{\mathbf{W}} \not\succeq 0$  according to Sylvester's criterion.

180 Next, we focus on the particular case of **Permutation** sketches, which are the most suitable for  
 181 model partitioning according to Independent Subnetwork Training (IST). At the rest of the section,  
 182 we discuss how the condition (14) can be enforced via a specially designed preconditioning of the  
 183 problem (12) or modification of sketch mechanism (7).

### 184 3.1.1 Homogeneous problem preconditioning

185 To start consider a homogeneous setting  $f_i(x) = \frac{1}{2} x^\top \mathbf{L}_i x$ , so  $\mathbf{L}_i \equiv \mathbf{L}$ . Now define  $\mathbf{D} = \text{Diag}(\mathbf{L})$  –  
 186 diagonal matrix with elements equal to diagonal of  $\mathbf{L}$ . Then problem can be converted to

$$f_i(\mathbf{D}^{-\frac{1}{2}} x) = \frac{1}{2} (\mathbf{D}^{-\frac{1}{2}} x)^\top \mathbf{L} (\mathbf{D}^{-\frac{1}{2}} x) = \frac{1}{2} x^\top \underbrace{(\mathbf{D}^{-\frac{1}{2}} \mathbf{L} \mathbf{D}^{-\frac{1}{2}})}_{\tilde{\mathbf{L}}} x, \quad (20)$$

187 which is equivalent to the original problem after a change of variables  $\tilde{x} := \mathbf{D}^{-\frac{1}{2}} x$ . Note that  
 188  $\mathbf{D} = \text{Diag}(\mathbf{L})$  is positive definite as  $\mathbf{L} \succ 0$ , and therefore  $\tilde{\mathbf{L}} \succ 0$ . Moreover, the preconditioned  
 189 matrix  $\tilde{\mathbf{L}}$  has all ones on the diagonal:  $\text{Diag}(\tilde{\mathbf{L}}) = \mathbf{I}$ . If we now combine it with Perm-1 sketches

$$\mathbb{E} [\bar{\mathbf{B}}^k] = \mathbb{E} \left[ \frac{1}{n} \sum_{i=1}^n \mathbf{C}_i \tilde{\mathbf{L}} \mathbf{C}_i \right] = n \text{Diag}(\tilde{\mathbf{L}}) = n \mathbf{I}.$$

190 Therefore, inequality (14) takes the form  $\tilde{\mathbf{W}} = n \tilde{\mathbf{L}} \succeq \frac{1}{\theta} n^2 \tilde{\mathbf{L}}$ , which holds for  $\theta \geq n$ , and left hand  
 191 side of (15) can be transformed the following way

$$\|\nabla f(x^k)\|_{\tilde{\mathbf{L}}^{-1} \tilde{\mathbf{W}} \tilde{\mathbf{L}}^{-1}}^2 \geq n \lambda_{\min}(\tilde{\mathbf{L}}^{-1}) \|\nabla f(x^k)\|_{\mathbf{I}}^2 = n \lambda_{\max}(\tilde{\mathbf{L}}) \|\nabla f(x^k)\|_{\mathbf{I}}^2 \quad (21)$$

192 for an accurate comparison to standard methods. The resulting convergence guarantee

$$\frac{1}{K} \sum_{k=0}^{K-1} \mathbb{E} [\|\nabla f(x^k)\|_{\mathbf{I}}^2] \leq \frac{2 \lambda_{\max}(\tilde{\mathbf{L}}) (f(x^0) - \mathbb{E}[f(x^K)])}{K}, \quad (22)$$

193 which matches classical Gradient Descent.

### 194 3.1.2 Heterogeneous sketch preconditioning

195 In contrast to homogeneous case the heterogeneous problem  $f_i(x) = \frac{1}{2} x^\top \mathbf{L}_i x$  can not be so easily  
 196 preconditioned by a simple change of variables  $\tilde{x} := \mathbf{D}^{-\frac{1}{2}} x$ , as every client  $i$  has its own matrix  
 197  $\mathbf{L}_i$ . However, this problem can be fixed via the following modification of Perm-1, which scales the  
 198 output according to the diagonal elements of local smoothness matrix  $\mathbf{L}_i$ :

$$\tilde{\mathbf{C}}_i := \sqrt{n} \left[ \mathbf{L}_i^{-\frac{1}{2}} \right]_{\pi_i, \pi_i} e_{\pi_i} e_{\pi_i}^\top. \quad (23)$$

199 In this case  $\mathbb{E} [\tilde{\mathbf{C}}_i \mathbf{L}_i \tilde{\mathbf{C}}_i] = \mathbf{I}$ ,  $\mathbb{E} [\tilde{\mathbf{B}}^k] = \mathbf{I}$ , and  $\overline{\mathbf{W}} = \overline{\mathbf{L}}$ . Then inequality (14) is satisfied for  $\theta \geq 1$ .

200 If one plugs these results into (15), such convergence guarantee can be obtained

$$\frac{1}{K} \sum_{k=0}^{K-1} \mathbb{E} [\|\nabla f(x^k)\|_{\mathbf{I}}^2] \leq \frac{2\lambda_{\max}(\overline{\mathbf{L}})(f(x^0) - \mathbb{E}[f(x^K)])}{K}, \quad (24)$$

201 which matches the Gradient Descent result as well. Thus we can conclude that heterogeneity does not  
 202 bring such a fundamental challenge in this scenario. In addition, a method with Perm-1 is significantly  
 203 better in terms of computational and communication complexity as it requires calculating the local  
 204 gradients with respect to much smaller submodels and transmits only sparse updates.

205 This construction also shows that for  $\gamma = 1/\theta = 1$

$$\gamma \lambda_{\min} \left( \overline{\mathbf{L}}^{-\frac{1}{2}} \overline{\mathbf{W}} \overline{\mathbf{L}}^{-\frac{1}{2}} \right) = \lambda_{\min} \left( \overline{\mathbf{L}}^{-\frac{1}{2}} \overline{\mathbf{L}} \overline{\mathbf{L}}^{-\frac{1}{2}} \right) = 1, \quad (25)$$

206 which after plugging into the bound for the iterates (16) shows that the method basically converges in  
 207 1 iteration. This observation that sketch preconditioning can be extremely efficient, although it uses  
 208 only the diagonal elements of matrices  $\mathbf{L}_i$ .

209 Now when we understand that the method can perform very well in the special case of  $\tilde{\mathbf{b}}_i \equiv 0$  we can  
 210 move on to a more complicated situation.

## 211 4 Irreducible bias in the general case

212 Now we look at the most general heterogeneous case with different matrices and linear terms  
 213  $f_i(x) \equiv \frac{1}{2} x^\top \mathbf{L}_i x - x^\top \mathbf{b}_i$ . In this instance gradient estimator (2) takes the form

$$g^k = \frac{1}{n} \sum_{i=1}^n \mathbf{C}_i^k \nabla f_i(\mathbf{C}_i^k x^k) = \frac{1}{n} \sum_{i=1}^n \mathbf{C}_i^k (\mathbf{L}_i \mathbf{C}_i^k x^k - \mathbf{b}_i) = \overline{\mathbf{B}}^k x^k - \overline{\mathbf{C}} \mathbf{b}, \quad (26)$$

214 where  $\overline{\mathbf{C}} \mathbf{b} = \frac{1}{n} \sum_{i=1}^n \mathbf{C}_i^k \mathbf{b}_i$ . Herewith let us use a heterogeneous permutation sketch preconditioner  
 215 (23) like in Section 3.1.2. Then  $\mathbb{E} [\overline{\mathbf{B}}^k] = \mathbf{I}$  and  $\mathbb{E} [\overline{\mathbf{C}} \mathbf{b}] = \frac{1}{\sqrt{n}} \widetilde{\mathbf{D}} \mathbf{b}$ , where  $\widetilde{\mathbf{D}} \mathbf{b} := \frac{1}{n} \sum_{i=1}^n \mathbf{D}_i^{-\frac{1}{2}} \mathbf{b}_i$ .

216 Furthermore expected gradient estimator (26) results in  $\mathbb{E} [g^k] = x^k - \frac{1}{\sqrt{n}} \widetilde{\mathbf{D}} \mathbf{b}$  and can be transformed  
 217 the following way

$$\mathbb{E} [g^k] = \overline{\mathbf{L}}^{-1} \overline{\mathbf{L}} x^k \pm \overline{\mathbf{L}}^{-1} \mathbf{b} - \frac{1}{\sqrt{n}} \widetilde{\mathbf{D}} \mathbf{b} = \overline{\mathbf{L}}^{-1} \nabla f(x^k) + \underbrace{\overline{\mathbf{L}}^{-1} \mathbf{b} - \frac{1}{\sqrt{n}} \widetilde{\mathbf{D}} \mathbf{b}}_h, \quad (27)$$

218 which reflects the decomposition of the estimator into optimally preconditioned true gradient and a  
 219 bias, depending on the linear terms  $\mathbf{b}_i$ .

### 220 4.1 Bias of the method

221 Estimator (27) can be directly plugged (with proper conditioning) into general SGD update (2)

$$\mathbb{E} [x^{k+1}] = x^k - \gamma \mathbb{E} [g^k] = (1 - \gamma) x^k + \frac{\gamma}{\sqrt{n}} \widetilde{\mathbf{D}} \mathbf{b} = (1 - \gamma)^{k+1} x^0 + \frac{\gamma}{\sqrt{n}} \widetilde{\mathbf{D}} \mathbf{b} \sum_{j=0}^k (1 - \gamma)^j. \quad (28)$$

222 The resulting recursion (28) is exact, and its asymptotic limit can be analyzed. Thus for constant  
 223  $\gamma < 1$  by using the formula for the sum of the first  $k$  terms of a geometric series, one gets

$$\mathbb{E} [x^k] = (1 - \gamma)^k x^0 + \frac{1 - (1 - \gamma)^k}{\sqrt{n}} \widetilde{\mathbf{D}} \mathbf{b} \xrightarrow{k \rightarrow \infty} \frac{1}{\sqrt{n}} \widetilde{\mathbf{D}} \mathbf{b},$$

which shows that in the limit, the first initialization term (with  $x^0$ ) vanishes while the second converges  
 to  $\frac{1}{\sqrt{n}} \widetilde{\mathbf{D}} \mathbf{b}$ . This reasoning shows that the method does not converge to the exact solution

$$\mathbb{E} [x^k] \rightarrow x^\infty \neq x^* \in \arg \min_{x \in \mathbb{R}^d} \left\{ \frac{1}{2} x^\top \overline{\mathbf{L}} x - x^\top \mathbf{b} \right\},$$

224 which for the positive-definite  $\overline{\mathbf{L}}$  can be defined as  $x^* = \overline{\mathbf{L}}^{-1} \mathbf{b}$ , while  $x^\infty = \frac{1}{n\sqrt{n}} \sum_{i=1}^n \mathbf{D}_i^{-\frac{1}{2}} \mathbf{b}_i$ . So,  
 225 in general, there is an unavoidable bias. However, in the limit case:  $n = d \rightarrow \infty$ , the bias diminishes.



## 4.2 Generic convergence analysis

While the analysis in Section 4.1 is precise, it does not allow us to compare the convergence of IST to standard optimization methods. Due to this, we also analyze the non-asymptotic behavior of the method to understand the convergence speed. Our result is formalized in the following theorem.

**Theorem 2.** Consider the method (2) with estimator (26) for a quadratic problem (12) with the positive definite matrix  $\bar{\mathbf{L}} \succ 0$ . Assume that for every  $\mathbf{D}_i := \text{Diag}(\mathbf{L}_i)$  matrices  $\mathbf{D}_i^{-\frac{1}{2}}$  exist, scaled permutation sketches (23) are used and heterogeneity is bounded as  $\mathbb{E} [\|g^k - \mathbb{E}[g^k]\|_{\bar{\mathbf{L}}}^2] \leq \sigma^2$ . Then for step size is chosen as

$$0 < \gamma \leq \gamma_{c,\beta} := \frac{1/2-\beta}{\beta+1/2}, \quad (29)$$

where  $\gamma_{c,\beta} \in (0, 1]$  for  $\beta \in (0, 1/2)$ , the iterates satisfy

$$\frac{1}{K} \sum_{k=0}^{K-1} \mathbb{E} [\|\nabla f(x^k)\|_{\bar{\mathbf{L}}^{-1}}^2] \leq \frac{2(f(x^0) - \mathbb{E}[f(x^K)])}{\gamma K} + (2\beta^{-1}(1-\gamma) + \gamma) \|h\|_{\bar{\mathbf{L}}}^2 + \gamma \sigma^2, \quad (30)$$

where  $\bar{\mathbf{L}} = \frac{1}{n} \sum_{i=1}^n \mathbf{L}_i$ ,  $h = \bar{\mathbf{L}}^{-1} \bar{\mathbf{b}} - \frac{1}{\sqrt{n}} \frac{1}{n} \sum_{i=1}^n \mathbf{D}_i^{-\frac{1}{2}} \mathbf{b}_i$  and  $\bar{\mathbf{b}} = \frac{1}{n} \sum_{i=1}^n \mathbf{b}_i$ .

Note that the derived convergence upper bound has a neighborhood proportional to the bias of the gradient estimator  $h$  and level of heterogeneity  $\sigma^2$ . Some of these terms with factor  $\gamma$  can be eliminated via decreasing learning rate schedule (e.g.,  $\sim 1/\sqrt{k}$ ). However, such a strategy does not diminish the term with a multiplier  $2\beta^{-1}(1-\gamma)$ , making the neighborhood irreducible. Moreover, this term can be eliminated for  $\gamma = 1$ , which also minimizes the first term that decreases as  $1/K$ . Though, such step size choice maximizes the terms with factor  $\gamma$ . Furthermore, there exists an inherent trade-off between convergence speed and the size of the neighborhood.

In addition, convergence to the stationary point is measured in the weighted by  $\bar{\mathbf{L}}^{-1}$  squared norm of the gradient. At the same time, the neighborhood term depends on the weighted by  $\bar{\mathbf{L}}$  norm of  $h$ . This fine-grained decoupling is achieved by carefully applying Fenchel-Young inequality and provides a tighter characterization of the convergence compared to using standard Euclidean distances.

**Homogeneous case.** In this scenario, every worker has access to the all data  $f_i(x) \equiv \frac{1}{2}x^\top \mathbf{L}x - x^\top \mathbf{b}$ . Then diagonal preconditioning of the problem can be used as in the previous Section 3.1.1. This results in a gradient  $\nabla f(x) = \tilde{\mathbf{L}}x - \tilde{\mathbf{b}}$  for  $\tilde{\mathbf{L}} = \mathbf{D}^{-\frac{1}{2}} \mathbf{L} \mathbf{D}^{-\frac{1}{2}}$  and  $\tilde{\mathbf{b}} = \mathbf{D}^{-\frac{1}{2}} \mathbf{b}$ . If it is further combined with a scaled by  $1/\sqrt{n}$  Permutation sketch  $\mathbf{C}_i' := \sqrt{n} e_{\pi_i} e_{\pi_i}^\top$ , the resulting gradient estimator is

$$g^k = x^k - \frac{1}{\sqrt{n}} \tilde{\mathbf{b}} = \tilde{\mathbf{L}}^{-1} \nabla f(x^k) + \tilde{h}, \quad (31)$$

for  $\tilde{h} = \tilde{\mathbf{L}}^{-1} \tilde{\mathbf{b}} - \frac{1}{\sqrt{n}} \tilde{\mathbf{b}}$ . In this case heterogeneity term  $\sigma^2$  from upper bound (30) disappears as  $\mathbb{E} [\|g^k - \mathbb{E}[g^k]\|_{\bar{\mathbf{L}}}^2] = 0$ , thus the neighborhood size can significantly decrease. However, the bias term depending on  $\tilde{h}$  still remains as the method does not converge to the exact solution  $x^k \rightarrow x^\infty \neq x^* = \tilde{\mathbf{L}}^{-1} \tilde{\mathbf{b}}$  for positive-definite  $\tilde{\mathbf{L}}$ . Nevertheless the method's fixed point  $x^\infty = \tilde{\mathbf{b}}/\sqrt{n}$  and solution  $x^*$  can coincide when  $\tilde{\mathbf{L}}^{-1} \tilde{\mathbf{b}} = \frac{1}{\sqrt{n}} \tilde{\mathbf{b}}$ , which means that  $\tilde{\mathbf{b}}$  is the right eigenvector of matrix  $\tilde{\mathbf{L}}^{-1}$  with eigenvalue  $\frac{1}{\sqrt{n}}$ .

Let us contrast obtained result (30) with non-convex rate of SGD [25] with constant step size  $\gamma$  for  $L$ -smooth and lower-bounded  $f$

$$\min_{k \in \{0, \dots, K-1\}} \|\nabla f(x^k)\|^2 \leq \frac{6(f(x^0) - \inf f)}{\gamma K} + \gamma LC, \quad (32)$$

where constant  $C$  depends, for example, on the variance of stochastic gradient estimates. Observe that the first term in the compared upper bounds (32) and (30) is almost identical and decreases with speed  $1/K$ . But unlike (30) the neighborhood for SGD can be completely eliminated by reducing the step size  $\gamma$ . This highlights a fundamental difference of our results to unbiased methods.



263 The intuition behind this issue is that for SGD-type methods like Compressed Gradient Descent

$$x^{k+1} = x^k - \mathcal{C}(\nabla f(x^k)) \quad (33)$$

264 the gradient estimate is unbiased and enjoys the property that variance

$$\mathbb{E} [\|\mathcal{C}(\nabla f(x^k)) - \nabla f(x^k)\|^2] \leq \omega \|\nabla f(x^k)\|^2 \quad (34)$$

265 goes down to zero as the method progresses because  $\nabla f(x^k) \rightarrow \nabla f(x^*) = 0$  in the unconstrained  
266 case. In addition, any stationary point  $x^*$  ceases to be a fixed point of the iterative procedure as

$$x^* \neq x^* - \nabla f(\mathcal{C}(x^*)), \quad (35)$$

267 in the general case, unlike for Compressed Gradient Descent with both biased and unbiased compres-  
268 sors  $\mathcal{C}$ . So, even if the method (computing gradient at sparse model) is initialized from the *solution*  
269 after one gradient step, it may get away from there.

### 270 4.3 Comparison to previous works

271 **Independent Subnetwork Training [45].** There are several improvements over the previous works  
272 that tried to theoretically analyze the convergence of Distributed IST.

273 The first difference is that our results allow for an almost arbitrary level of model sparsification,  
274 i.e., work for any  $\omega \geq 0$  as permutation sketches can be viewed as a special case of compression  
275 operators (1). This improves significantly over the work of [45], which demands<sup>3</sup>  $\omega \lesssim \mu^2/L^2$ . Such a  
276 requirement is very restrictive as the condition number  $L/\mu$  of the loss function  $f$  is typically very  
277 large for any non-trivial optimization problem. Thus, the sparsifier’s (4) variance  $\omega = d/q - 1$  has to  
278 be very close to 0 and  $q \approx d$ . So, the previous theory allows almost no compression (sparsification)  
279 because it is based on the analysis of Gradient Descent with Compressed Iterates [24].

280 The second distinction is that the original IST work [45] considered a single node setting and thus  
281 their convergence bounds did not capture the effect of heterogeneity, which we believe is of crucial  
282 importance for distributed setting [9, 39]. Besides, they consider Lipschitz continuity of the loss  
283 function  $f$ , which is not satisfied for a simple quadratic model. A more detailed comparison including  
284 additional assumptions on the gradient estimator made in [45] is presented in the Appendix.

285 **FL with Model Pruning.** In a recent work [48] made an attempt to analyze a variant of the FedAvg  
286 algorithm with sparse local initialization and compressed gradient training (pruned local models).  
287 They considered a case of  $L$ -smooth loss and sparsification operator satisfying a similar condition to  
288 (1). However, they also assumed that the squared norm of stochastic gradient is uniformly bounded  
289 (11), which is “pathological” [23] especially in the case of local methods as it does not allow to  
290 capture the very important effect of heterogeneity and can result in vacuous bounds.

291 In the Appendix we show some limitations of other relevant previous approaches to training with  
292 compressed models: too restrictive assumptions on the algorithm [33] or not applicability in our  
293 problem setting [7].

## 294 5 Conclusions and Future Work

295 In this study, we introduced a novel approach to understanding training with combined model and  
296 data parallelism for a quadratic model. This framework allowed to shed light on distributed submodel  
297 optimization which revealed the advantages and limitations Independent Subnetwork Training (IST).  
298 Moreover, we accurately characterized the behavior of the considered method in both homogeneous  
299 and heterogeneous scenarios without imposing restrictive assumptions on gradient estimators.

300 In future research, it would be valuable to explore extensions of our findings to settings that are closer  
301 to practical scenarios, such as cross-device federated learning. This could involve investigating partial  
302 participation support, leveraging local training benefits, and ensuring robustness against stragglers.  
303 Additionally, it would be interesting to generalize our results to non-quadratic scenarios without  
304 relying on pathological assumptions.

<sup>3</sup> $\mu$  refers to constant from Polyak-Łojasiewicz (or strong convexity) condition. In case of a quadratic problem with positive-definite matrix  $\mathbf{A}$ :  $\mu = \lambda_{\min}(\mathbf{A})$

## References

- [1] Ahmad Ajalloeian and Sebastian U Stich. On the convergence of SGD with biased gradients. *arXiv preprint arXiv:2008.00051*, 2020. (Cited on page 4)
- [2] Samiul Alam, Luyang Liu, Ming Yan, and Mi Zhang. FedRolex: Model-heterogeneous federated learning with rolling sub-model extraction. In Alice H. Oh, Alekh Agarwal, Danielle Belgrave, and Kyunghyun Cho, editors, *Advances in Neural Information Processing Systems*, 2022. (Cited on page 2)
- [3] Dan Alistarh, Demjan Grubic, Jerry Li, Ryota Tomioka, and Milan Vojnovic. QSGD: Communication-efficient SGD via gradient quantization and encoding. In *Advances in Neural Information Processing Systems*, volume 30. Curran Associates, Inc., 2017. (Cited on pages 1, 3, and 4)
- [4] Yossi Arjevani, Ohad Shamir, and Nathan Srebro. A tight convergence analysis for stochastic gradient descent with delayed updates. In *Algorithmic Learning Theory*, pages 111–132. PMLR, 2020. (Cited on page 4)
- [5] Sebastian Caldas, Jakub Konečný, H Brendan McMahan, and Ameet Talwalkar. Expanding the reach of federated learning by reducing client resource requirements. *arXiv preprint arXiv:1812.07210*, 2018. (Cited on page 2)
- [6] Zachary Charles, Kallista Bonawitz, Stanislav Chiknavaryan, Brendan McMahan, et al. Federated select: A primitive for communication-and memory-efficient federated learning. *arXiv preprint arXiv:2208.09432*, 2022. (Cited on page 2)
- [7] El Mahdi Chayti and Sai Praneeth Karimireddy. Optimization with access to auxiliary information. *arXiv preprint arXiv:2206.00395*, 2022. (Cited on pages 9 and 24)
- [8] Yuanyuan Chen, Zichen Chen, Pengcheng Wu, and Han Yu. Fedobd: Opportunistic block dropout for efficiently training large-scale neural networks through federated learning. *arXiv preprint arXiv:2208.05174*, 2022. (Cited on page 2)
- [9] Sélim Chraïbi, Ahmed Khaled, Dmitry Kovalev, Peter Richtárik, Adil Salim, and Martin Takáč. Distributed fixed point methods with compressed iterates. *arXiv preprint arXiv:2102.07245*, 2019. (Cited on page 9)
- [10] Leonardo Cunha, Gauthier Gidel, Fabian Pedregosa, Damien Scieur, and Courtney Paquette. Only tails matter: Average-case universality and robustness in the convex regime. In *International Conference on Machine Learning*, pages 4474–4491. PMLR, 2022. (Cited on page 4)
- [11] Jeffrey Dean, Greg Corrado, Rajat Monga, Kai Chen, Matthieu Devin, Mark Mao, Marc’aurelio Ranzato, Andrew Senior, Paul Tucker, Ke Yang, et al. Large scale distributed deep networks. *Advances in neural information processing systems*, 25, 2012. (Cited on page 1)
- [12] Enmao Diao, Jie Ding, and Vahid Tarokh. Heterofl: Computation and communication efficient federated learning for heterogeneous clients. *arXiv preprint arXiv:2010.01264*, 2020. (Cited on page 2)
- [13] Chen Dun, Mirian Hipolito, Chris Jermaine, Dimitrios Dimitriadis, and Anastasios Kyrillidis. Efficient and light-weight federated learning via asynchronous distributed dropout. *arXiv preprint arXiv:2210.16105*, 2022. (Cited on page 2)
- [14] Chen Dun, Cameron R Wolfe, Christopher M Jermaine, and Anastasios Kyrillidis. ResIST: Layer-wise decomposition of resnets for distributed training. In *Uncertainty in Artificial Intelligence*, pages 610–620. PMLR, 2022. (Cited on page 2)
- [15] Philipp Farber and Krste Asanovic. Parallel neural network training on multi-spert. In *Proceedings of 3rd International Conference on Algorithms and Architectures for Parallel Processing*, pages 659–666. IEEE, 1997. (Cited on page 1)

- [16] Eduard Gorbunov, Filip Hanzely, and Peter Richtárik. A unified theory of SGD: Variance reduction, sampling, quantization and coordinate descent. In *International Conference on Artificial Intelligence and Statistics*, pages 680–690. PMLR, 2020. (Cited on page 4)
- [17] Baptiste Goujaud, Damien Scieur, Aymeric Dieuleveut, Adrien B Taylor, and Fabian Pedregosa. Super-acceleration with cyclical step-sizes. In *International Conference on Artificial Intelligence and Statistics*, pages 3028–3065. PMLR, 2022. (Cited on page 4)
- [18] Robert Mansel Gower, Nicolas Loizou, Xun Qian, Alibek Sailanbayev, Egor Shulgin, and Peter Richtárik. SGD: General analysis and improved rates. *Proceedings of the 36th International Conference on Machine Learning, Long Beach, California*, 2019. (Cited on page 4)
- [19] Priya Goyal, Piotr Dollár, Ross Girshick, Pieter Noordhuis, Lukasz Wesolowski, Aapo Kyrola, Andrew Tulloch, Yangqing Jia, and Kaiming He. Accurate, large minibatch SGD: Training imagenet in 1 hour. *arXiv preprint arXiv:1706.02677*, 2018. (Cited on page 1)
- [20] Samuel Horvath, Stefanos Laskaridis, Mario Almeida, Ilias Leontiadis, Stylianos Venieris, and Nicholas Lane. FjORD: Fair and accurate federated learning under heterogeneous targets with ordered dropout. *Advances in Neural Information Processing Systems*, 34:12876–12889, 2021. (Cited on page 2)
- [21] Yuang Jiang, Shiqiang Wang, Victor Valls, Bong Jun Ko, Wei-Han Lee, Kin K Leung, and Leandros Tassiulas. Model pruning enables efficient federated learning on edge devices. *IEEE Transactions on Neural Networks and Learning Systems*, 2022. (Cited on page 2)
- [22] Peter Kairouz, H. Brendan McMahan, Brendan Avent, Aurélien Bellet, Mehdi Bennis, Arjun Nitin Bhagoji, Kallista A. Bonawitz, Zachary Charles, Graham Cormode, Rachel Cummings, Rafael G. L. D’Oliveira, Hubert Eichner, Salim El Rouayheb, David Evans, Josh Gardner, Zachary Garrett, Adrià Gascón, Badi Ghazi, Phillip B. Gibbons, Marco Gruteser, Zaïd Harchaoui, Chaoyang He, Lie He, Zhouyuan Huo, Ben Hutchinson, Justin Hsu, Martin Jaggi, Tara Javidi, Gauri Joshi, Mikhail Khodak, Jakub Konečný, Aleksandra Korolova, Farinaz Koushanfar, Sanmi Koyejo, Tancrède Lepoint, Yang Liu, Prateek Mittal, Mehryar Mohri, Richard Nock, Ayfer Özgür, Rasmus Pagh, Hang Qi, Daniel Ramage, Ramesh Raskar, Mariana Raykova, Dawn Song, Weikang Song, Sebastian U. Stich, Ziteng Sun, Ananda Theertha Suresh, Florian Tramèr, Praneeth Vepakomma, Jianyu Wang, Li Xiong, Zheng Xu, Qiang Yang, Felix X. Yu, Han Yu, and Sen Zhao. Advances and open problems in federated learning. *Found. Trends Mach. Learn.*, 14(1-2):1–210, 2021. (Cited on page 2)
- [23] Ahmed Khaled, Konstantin Mishchenko, and Peter Richtárik. Tighter theory for local SGD on identical and heterogeneous data. In *International Conference on Artificial Intelligence and Statistics*, pages 4519–4529. PMLR, 2020. (Cited on pages 4 and 9)
- [24] Ahmed Khaled and Peter Richtárik. Gradient descent with compressed iterates. *arXiv preprint arXiv:1909.04716*, 2019. (Cited on page 9)
- [25] Ahmed Khaled and Peter Richtárik. Better theory for SGD in the nonconvex world. *Transactions on Machine Learning Research*, 2023. Survey Certification. (Cited on pages 4 and 8)
- [26] Sarit Khirirat, Hamid Reza Feyzmahdavian, and Mikael Johansson. Distributed learning with compressed gradients. *arXiv preprint arXiv:1806.06573*, 2018. (Cited on page 4)
- [27] Jakub Konečný, H. Brendan McMahan, Felix X. Yu, Peter Richtárik, Ananda Theertha Suresh, and Dave Bacon. Federated learning: Strategies for improving communication efficiency. *NIPS Private Multi-Party Machine Learning Workshop*, 2016. (Cited on pages 1, 2, and 3)
- [28] Fangshuo Liao and Anastasios Kyrillidis. On the convergence of shallow neural network training with randomly masked neurons. *Transactions on Machine Learning Research*, 2022. (Cited on page 2)
- [29] Rongmei Lin, Yonghui Xiao, Tien-Ju Yang, Ding Zhao, Li Xiong, Giovanni Motta, and Françoise Beaufays. Federated pruning: Improving neural network efficiency with federated learning. *arXiv preprint arXiv:2209.06359*, 2022. (Cited on page 2)

- [30] Tao Lin, Sebastian U Stich, Luis Barba, Daniil Dmitriev, and Martin Jaggi. Dynamic model pruning with feedback. In *International Conference on Learning Representations*, 2019. (Cited on page 4)
- [31] Brendan McMahan, Eider Moore, Daniel Ramage, Seth Hampson, and Blaise Aguera y Arcas. Communication-Efficient Learning of Deep Networks from Decentralized Data. In *Proceedings of the 20th International Conference on Artificial Intelligence and Statistics*, volume 54 of *Proceedings of Machine Learning Research*, pages 1273–1282, 20–22 Apr 2017. (Cited on page 2)
- [32] Konstantin Mishchenko, Grigory Malinovsky, Sebastian Stich, and Peter Richtárik. ProxSkip: Yes! local gradient steps provably lead to communication acceleration! finally! In *International Conference on Machine Learning*, pages 15750–15769. PMLR, 2022. (Cited on page 2)
- [33] Amirkeivan Mohtashami, Martin Jaggi, and Sebastian Stich. Masked training of neural networks with partial gradients. In *International Conference on Artificial Intelligence and Statistics*, pages 5876–5890. PMLR, 2022. (Cited on pages 9 and 24)
- [34] Yu Nesterov. Efficiency of coordinate descent methods on huge-scale optimization problems. *SIAM Journal on Optimization*, 22(2):341–362, 2012. (Cited on page 4)
- [35] Xinchu Qiu, Javier Fernandez-Marques, Pedro PB Gusmao, Yan Gao, Titouan Parcollet, and Nicholas Donald Lane. ZeroFL: Efficient on-device training for federated learning with local sparsity. In *International Conference on Learning Representations*, 2022. (Cited on page 2)
- [36] Peter Richtárik and Martin Takáč. Iteration complexity of randomized block-coordinate descent methods for minimizing a composite function. *Mathematical Programming*, 144(1-2):1–38, 2014. (Cited on page 4)
- [37] Peter Richtárik and Martin Takáč. Distributed coordinate descent method for learning with big data. *Journal of Machine Learning Research*, 17(75):1–25, 2016. (Cited on page 1)
- [38] Frank Seide, Hao Fu, Jasha Droppo, Gang Li, and Dong Yu. 1-bit stochastic gradient descent and its application to data-parallel distributed training of speech dnns. In *Fifteenth Annual Conference of the International Speech Communication Association*, 2014. (Cited on pages 1 and 3)
- [39] Egor Shulgin and Peter Richtárik. Shifted compression framework: Generalizations and improvements. In *The 38th Conference on Uncertainty in Artificial Intelligence*, 2022. (Cited on page 9)
- [40] Rafał Szlendak, Alexander Tyurin, and Peter Richtárik. Permutation compressors for provably faster distributed nonconvex optimization. In *International Conference on Learning Representations*, 2022. (Cited on pages 3, 5, 22, and 23)
- [41] Jianyu Wang, Zachary Charles, Zheng Xu, Gauri Joshi, H Brendan McMahan, Maruan Al-Shedivat, Galen Andrew, Salman Avestimehr, Katharine Daly, Deepesh Data, et al. A field guide to federated optimization. *arXiv preprint arXiv:2107.06917*, 2021. (Cited on page 2)
- [42] Dingzhu Wen, Ki-Jun Jeon, and Kaibin Huang. Federated dropout—a simple approach for enabling federated learning on resource constrained devices. *IEEE Wireless Communications Letters*, 11(5):923–927, 2022. (Cited on page 2)
- [43] Cameron R Wolfe, Jingkan Yang, Arindam Chowdhury, Chen Dun, Artun Bayer, Santiago Segarra, and Anastasios Kyrillidis. Gist: Distributed training for large-scale graph convolutional networks. *arXiv preprint arXiv:2102.10424*, 2021. (Cited on page 2)
- [44] Tien-Ju Yang, Dhruv Guliani, Françoise Beaufays, and Giovanni Motta. Partial variable training for efficient on-device federated learning. In *ICASSP 2022-2022 IEEE International Conference on Acoustics, Speech and Signal Processing (ICASSP)*, pages 4348–4352. IEEE, 2022. (Cited on page 2)

- 448 [45] Binhang Yuan, Cameron R Wolfe, Chen Dun, Yuxin Tang, Anastasios Kyrillidis, and Chris  
449 Jermaine. Distributed learning of fully connected neural networks using independent subnet  
450 training. *Proceedings of the VLDB Endowment*, 15(8):1581–1590, 2022. (Cited on pages 2, 9,  
451 and 23)
- 452 [46] Guodong Zhang, Lala Li, Zachary Nado, James Martens, Sushant Sachdeva, George Dahl, Chris  
453 Shallue, and Roger B Grosse. Which algorithmic choices matter at which batch sizes? insights  
454 from a noisy quadratic model. *Advances in neural information processing systems*, 32, 2019.  
455 (Cited on page 4)
- 456 [47] Xiru Zhang, Michael Mckenna, Jill Mesirov, and David Waltz. An efficient implementation  
457 of the back-propagation algorithm on the connection machine cm-2. *Advances in neural  
458 information processing systems*, 2, 1989. (Cited on page 1)
- 459 [48] Hanhan Zhou, Tian Lan, Guru Venkataramani, and Wenbo Ding. On the convergence of  
460 heterogeneous federated learning with arbitrary adaptive online model pruning. *arXiv preprint  
461 arXiv:2201.11803*, 2022. (Cited on pages 4 and 9)
- 462 [49] Libin Zhu, Chaoyue Liu, Adityanarayanan Radhakrishnan, and Mikhail Belkin. Quadratic  
463 models for understanding neural network dynamics. *arXiv preprint arXiv:2205.11787*, 2022.  
464 (Cited on page 4)
- 465 [50] Martin Zinkevich, Markus Weimer, Lihong Li, and Alex Smola. Parallelized stochastic gradient  
466 descent. *Advances in neural information processing systems*, 23, 2010. (Cited on page 1)

# Supplementary Material

## Contents

|     |                                                                                        |           |
|-----|----------------------------------------------------------------------------------------|-----------|
| 469 | <b>1 Introduction</b>                                                                  | <b>1</b>  |
| 470 | 1.1 The need for model parallel . . . . .                                              | 1         |
| 471 | 1.2 Summary of contributions . . . . .                                                 | 2         |
| 472 | <b>2 Formalism and setup</b>                                                           | <b>2</b>  |
| 473 | 2.1 Issues with existing approaches . . . . .                                          | 4         |
| 474 | <b>3 Results in the interpolation case</b>                                             | <b>4</b>  |
| 475 | 3.1 No linear term: problems and solutions . . . . .                                   | 5         |
| 476 | 3.1.1 Homogeneous problem preconditioning . . . . .                                    | 6         |
| 477 | 3.1.2 Heterogeneous sketch preconditioning . . . . .                                   | 6         |
| 478 | <b>4 Irreducible bias in the general case</b>                                          | <b>7</b>  |
| 479 | 4.1 Bias of the method . . . . .                                                       | 7         |
| 480 | 4.2 Generic convergence analysis . . . . .                                             | 8         |
| 481 | 4.3 Comparison to previous works . . . . .                                             | 9         |
| 482 | <b>5 Conclusions and Future Work</b>                                                   | <b>9</b>  |
| 483 | <b>A Basic and auxiliary facts</b>                                                     | <b>15</b> |
| 484 | <b>B Proofs</b>                                                                        | <b>15</b> |
| 485 | B.1 Permutation sketch computations . . . . .                                          | 15        |
| 486 | B.1.1 Heterogeneous sketch preconditioning. . . . .                                    | 15        |
| 487 | B.2 Interpolation case: proof of Theorem 1 . . . . .                                   | 16        |
| 488 | B.3 Non-zero solution . . . . .                                                        | 17        |
| 489 | B.3.1 Generic convergence analysis for heterogeneous case: proof of Theorem 2. . . . . | 18        |
| 490 | B.3.2 Homogeneous case . . . . .                                                       | 20        |
| 491 | B.4 Generalization to $n \neq d$ case. . . . .                                         | 22        |
| 492 | <b>C Comparison to previous related works</b>                                          | <b>23</b> |
| 493 | <b>D Experiments</b>                                                                   | <b>25</b> |

## 494 A Basic and auxiliary facts

495 **L**-matrix smoothness:

$$f(x+h) \leq f(x) + \langle \nabla f(x), h \rangle + \frac{1}{2} \langle \mathbf{L}h, h \rangle, \quad \forall x, h \in \mathbb{R}^d. \quad (36)$$

496 **Basic Inequalities.** For all vectors  $a, b \in \mathbb{R}^d$  and random vector  $X \in \mathbb{R}^d$ :

$$2\langle a, b \rangle = \|a\|^2 + \|b\|^2 - \|a - b\|^2, \quad (37)$$

497

$$\mathbf{E} \|X - a\|^2 = \mathbf{E} \|X - \mathbf{E} X\|^2 + \|\mathbf{E} X - a\|^2. \quad (38)$$

498 **Lemma 1** (Fenchel–Young inequality). *For any function  $f$  and its convex conjugate  $f^*$ , Fenchel’s*  
 499 *inequality (also known as the Fenchel–Young inequality) holds for every  $x, y \in \mathbb{R}^d$*

$$\langle x, y \rangle \leq f(x) + f^*(y).$$

500 *The proof follows from the definition of conjugate:  $f^*(y) := \sup_{x'} \{\langle y, x' \rangle - f(x')\} \geq \langle y, x \rangle - f(x)$ .*

501 In the case of a quadratic function  $f(x) = \beta \|x\|_{\mathbf{L}}^2$  we can compute  $f^*(y) = \frac{1}{4} \beta^{-1} \|y\|_{\mathbf{L}^{-1}}^2$ . Thus

$$\langle x, y \rangle \leq \beta \|x\|_{\mathbf{L}}^2 + \frac{1}{4} \beta^{-1} \|y\|_{\mathbf{L}^{-1}}^2. \quad (39)$$

## 502 B Proofs

### 503 B.1 Permutation sketch computations

504 All derivations in this section are performed for  $n = d$  case.

505 **Classical Permutation Sketching.** Perm-1:  $\mathbf{C}_i = n e_{\pi_i} e_{\pi_i}^\top$ , where  $\pi = (\pi_1, \dots, \pi_n)$  is a random  
 506 permutation of  $[n]$ . For homogeneous problem  $\mathbf{L}_i \equiv \mathbf{L}$ :

$$\mathbb{E} [\overline{\mathbf{B}}^k] = \mathbb{E} \left[ \frac{1}{n} \sum_{i=1}^n \mathbf{C}_i \mathbf{L} \mathbf{C}_i \right] = n \text{Diag}(\mathbf{L}) \quad (40)$$

507 Then

$$2 \overline{\mathbf{W}} = \mathbb{E} [\mathbf{L} \overline{\mathbf{B}}^k + \overline{\mathbf{B}}^k \mathbf{L}] = n (\mathbf{L} \text{Diag}(\mathbf{L}) + \text{Diag}(\mathbf{L}) \mathbf{L}) \quad (41)$$

508 and

$$\mathbb{E} [\overline{\mathbf{B}}^k \mathbf{L} \overline{\mathbf{B}}^k] = n^2 \text{Diag}(\mathbf{L}) \mathbf{L} \text{Diag}(\mathbf{L}). \quad (42)$$

509 Almost the same calculations can be performed for  $\mathbf{C}'_i = \sqrt{n} e_{\pi_i} e_{\pi_i}^\top$ .

#### 510 B.1.1 Heterogeneous sketch preconditioning.

511 We recall the following modification of Perm-1:

$$\tilde{\mathbf{C}}_i := \sqrt{n} \left[ \mathbf{L}_i^{-\frac{1}{2}} \right]_{\pi_i, \pi_i} e_{\pi_i} e_{\pi_i}^\top. \quad (43)$$

512 Then

$$\mathbb{E} [\tilde{\mathbf{C}}_i \mathbf{L}_i \tilde{\mathbf{C}}_i] = \mathbb{E} [n [\mathbf{L}_i^{-1}]_{\pi_i, \pi_i} e_{\pi_i} e_{\pi_i}^\top \mathbf{L}_i e_{\pi_i} e_{\pi_i}^\top] = \frac{1}{n} \sum_{j=1}^n n e_j \mathbf{I}_{j,j} e_j^\top = \mathbf{I}. \quad (44)$$



513 and

$$\begin{aligned}
\mathbb{E} [\bar{\mathbf{B}}^k] &= \mathbb{E} \left[ \frac{1}{n} \sum_{i=1}^n \tilde{\mathbf{C}}_i \mathbf{L}_i \tilde{\mathbf{C}}_i \right] \\
&= \frac{1}{n} \sum_{i=1}^n \mathbb{E} [n [\mathbf{L}_i^{-1}]_{\pi_i, \pi_i} e_{\pi_i} e_{\pi_i}^\top \mathbf{L}_i e_{\pi_i} e_{\pi_i}^\top] \\
&= \frac{1}{n} \sum_{i=1}^n \frac{1}{n} \sum_{j=1}^n n [\mathbf{L}_i^{-1}]_{j,j} e_j e_j^\top [\mathbf{L}_i]_{j,j} e_j e_j^\top \\
&= \frac{1}{n} \sum_{i=1}^n \sum_{j=1}^n e_j e_j^\top \\
&= \mathbf{I}.
\end{aligned}$$

514 Thus  $\bar{\mathbf{W}} = \frac{1}{2} \mathbb{E} [\bar{\mathbf{L}} \bar{\mathbf{B}}^k + \bar{\mathbf{B}}^k \bar{\mathbf{L}}] = \bar{\mathbf{L}}$ . For the left hand side of inequality (14) we have

$$\begin{aligned}
\mathbb{E} [\bar{\mathbf{B}}^k \bar{\mathbf{L}} \bar{\mathbf{B}}^k] &= \mathbb{E} \left[ \frac{1}{n} \sum_{i=1}^n \tilde{\mathbf{C}}_i \mathbf{L}_i \tilde{\mathbf{C}}_i \bar{\mathbf{L}} \frac{1}{n} \sum_{j=1}^n \tilde{\mathbf{C}}_j \mathbf{L}_j \tilde{\mathbf{C}}_j \right] \\
&= \frac{1}{n^2} \sum_{i,j=1}^n \mathbb{E} [\tilde{\mathbf{C}}_i \mathbf{L}_i \tilde{\mathbf{C}}_i \bar{\mathbf{L}} \tilde{\mathbf{C}}_j \mathbf{L}_j \tilde{\mathbf{C}}_j] \\
&= \sum_{i,j=1}^n e_i e_i^\top \bar{\mathbf{L}} e_j e_j^\top \\
&= \mathbf{I} \bar{\mathbf{L}} \mathbf{I} \\
&= \bar{\mathbf{L}}.
\end{aligned}$$

## 515 B.2 Interpolation case: proof of Theorem 1

516 In the quadratic interpolation regime the linear term is zero  $f_i(x) = \frac{1}{2} x^\top \mathbf{L}_i x$ , and gradient estimator  
517 has the form

$$g^k = \frac{1}{n} \sum_{i=1}^n \mathbf{C}_i^k \nabla f_i(\mathbf{C}_i^k x^k) = \frac{1}{n} \sum_{i=1}^n \mathbf{C}_i^k \mathbf{L}_i \mathbf{C}_i^k x^k = \bar{\mathbf{B}}^k x^k. \quad (45)$$

518 *Proof.* At first we prove **stationary point** convergence result (15).

519 Using  $\bar{\mathbf{L}}$ -smoothness of function  $f$ , we get

$$\begin{aligned}
f(x^{k+1}) &\stackrel{(2)}{=} f(x^k - \gamma g^k) \stackrel{(8)}{\leq} f(x^k) - \langle \nabla f(x^k), \gamma g^k \rangle + \frac{\gamma^2}{2} \|g^k\|_{\bar{\mathbf{L}}}^2 \\
&\stackrel{(13)}{=} f(x^k) - \gamma \langle \bar{\mathbf{L}} x^k, \bar{\mathbf{B}}^k x^k \rangle + \frac{\gamma^2}{2} \|\bar{\mathbf{B}}^k x^k\|_{\bar{\mathbf{L}}}^2 \\
&= f(x^k) - \gamma (x^k)^\top \bar{\mathbf{L}} \bar{\mathbf{B}}^k x^k + \frac{\gamma^2}{2} (x^k)^\top \bar{\mathbf{B}}^k \bar{\mathbf{L}} \bar{\mathbf{B}}^k x^k.
\end{aligned}$$

After applying conditional expectation, using its linearity, and the fact that

$$x^\top \mathbf{A} x = \frac{1}{2} x^\top (\mathbf{A} + \mathbf{A}^\top) x$$

520 we get

$$\begin{aligned}
\mathbb{E} [f(x^{k+1}) \mid x^k] &\leq f(x^k) - \gamma(x^k)^\top \mathbb{E} [\bar{\mathbf{L}} \bar{\mathbf{B}}^k] x^k + \frac{\gamma^2}{2} (x^k)^\top \mathbb{E} [\bar{\mathbf{B}}^k \bar{\mathbf{L}} \bar{\mathbf{B}}^k] x^k \\
&= f(x^k) - \gamma(x^k)^\top \bar{\mathbf{W}} x^k + \frac{\gamma^2}{2} (x^k)^\top \mathbb{E} [\bar{\mathbf{B}}^k \bar{\mathbf{L}} \bar{\mathbf{B}}^k] x^k \\
&= f(x^k) - \gamma(\nabla f(x^k))^\top \bar{\mathbf{L}}^{-1} \bar{\mathbf{W}} \bar{\mathbf{L}}^{-1} \nabla f(x^k) \\
&\quad + \frac{\gamma^2}{2} (\nabla f(x^k))^\top \bar{\mathbf{L}}^{-1} \mathbb{E} [\bar{\mathbf{B}}^k \bar{\mathbf{L}} \bar{\mathbf{B}}^k] \bar{\mathbf{L}}^{-1} \nabla f(x^k) \\
&\stackrel{(14)}{\leq} f(x^k) - \gamma \|\nabla f(x^k)\|_{\bar{\mathbf{L}}^{-1} \bar{\mathbf{W}} \bar{\mathbf{L}}^{-1}}^2 + \frac{\theta \gamma^2}{2} \|\nabla f(x^k)\|_{\bar{\mathbf{L}}^{-1} \bar{\mathbf{W}} \bar{\mathbf{L}}^{-1}}^2 \\
&= f(x^k) - \gamma(1 - \theta \gamma/2) \|\nabla f(x^k)\|_{\bar{\mathbf{L}}^{-1} \bar{\mathbf{W}} \bar{\mathbf{L}}^{-1}}^2 \\
&\leq f(x^k) - \frac{\gamma}{2} \|\nabla f(x^k)\|_{\bar{\mathbf{L}}^{-1} \bar{\mathbf{W}} \bar{\mathbf{L}}^{-1}}^2,
\end{aligned}$$

521 where the last inequality holds for the stepsize  $\gamma \leq \frac{1}{\theta}$ .

522 Rearranging gives

$$\|\nabla f(x^k)\|_{\bar{\mathbf{L}}^{-1} \bar{\mathbf{W}} \bar{\mathbf{L}}^{-1}}^2 \leq \frac{2}{\gamma} (f(x^k) - \mathbb{E} [f(x^{k+1}) \mid x^k]),$$

523 which after averaging gives the desired result

$$\frac{1}{K} \sum_{k=0}^{K-1} \mathbb{E} [\|\nabla f(x^k)\|_{\bar{\mathbf{L}}^{-1} \bar{\mathbf{W}} \bar{\mathbf{L}}^{-1}}^2] \leq \frac{2}{\gamma K} \sum_{k=0}^{K-1} (f(x^k) - \mathbb{E} [f(x^{k+1})]) = \frac{2(f(x^0) - \mathbb{E} [f(x^K)])}{\gamma K}. \quad (46)$$

524 Now we show the result for the **iterates convergence** (16).

525 Expectation conditioned on  $x^k$ :

$$\begin{aligned}
r^{k+1} &:= \mathbb{E} [\|x^{k+1} - x^*\|_{\bar{\mathbf{L}}}^2] \\
&= \mathbb{E} [\|x^k - \gamma g^k - x^*\|_{\bar{\mathbf{L}}}^2] \\
&= \|x^k - x^*\|_{\bar{\mathbf{L}}}^2 - 2\gamma \langle x^k - x^*, \mathbb{E} [\bar{\mathbf{L}} \bar{\mathbf{B}}^k] (x^k - x^*) \rangle + \gamma^2 \langle \mathbb{E} [\bar{\mathbf{B}}^k \bar{\mathbf{L}} \bar{\mathbf{B}}^k] (x^k - x^*), x^k - x^* \rangle \\
&\stackrel{x^*=0}{=} r^k - 2\gamma \langle x^k - x^*, \bar{\mathbf{W}}(x^k - x^*) \rangle + \gamma^2 \langle x^k - x^*, \mathbb{E} [\bar{\mathbf{B}}^k \bar{\mathbf{L}} \bar{\mathbf{B}}^k] (x^k - x^*) \rangle \\
&\stackrel{(16)}{\leq} r^k - 2\gamma \langle x^k - x^*, \bar{\mathbf{W}}(x^k - x^*) \rangle + \theta \gamma^2 \langle x^k - x^*, \bar{\mathbf{W}}(x^k - x^*) \rangle \\
&= \|x^k - x^*\|_{\bar{\mathbf{L}}}^2 - 2\gamma(1 - \theta \gamma/2) \left\| \bar{\mathbf{L}}^{\frac{1}{2}}(x^k - x^*) \right\|_{\bar{\mathbf{L}}^{-\frac{1}{2}} \bar{\mathbf{W}} \bar{\mathbf{L}}^{-\frac{1}{2}}}^2 \\
&\stackrel{\gamma \leq 1/\theta}{\leq} \|x^k - x^*\|_{\bar{\mathbf{L}}}^2 - \gamma \left\| \bar{\mathbf{L}}^{\frac{1}{2}}(x^k - x^*) \right\|_{\bar{\mathbf{L}}^{-\frac{1}{2}} \bar{\mathbf{W}} \bar{\mathbf{L}}^{-\frac{1}{2}}}^2 \\
&\leq \|x^k - x^*\|_{\bar{\mathbf{L}}}^2 - \gamma \lambda_{\min} \left( \bar{\mathbf{L}}^{-\frac{1}{2}} \bar{\mathbf{W}} \bar{\mathbf{L}}^{-\frac{1}{2}} \right) \left\| \bar{\mathbf{L}}^{\frac{1}{2}}(x^k - x^*) \right\|^2 \\
&= \left( 1 - \gamma \lambda_{\min} \left( \bar{\mathbf{L}}^{-\frac{1}{2}} \bar{\mathbf{W}} \bar{\mathbf{L}}^{-\frac{1}{2}} \right) \right) \|x^k - x^*\|_{\bar{\mathbf{L}}}^2.
\end{aligned}$$

526 After unrolling the recursion we obtain the convergence result

$$\mathbb{E} [\|x^{k+1} - x^*\|_{\bar{\mathbf{L}}}^2] \leq \left( 1 - \gamma \lambda_{\min} \left( \bar{\mathbf{L}}^{-\frac{1}{2}} \bar{\mathbf{W}} \bar{\mathbf{L}}^{-\frac{1}{2}} \right) \right)^{k+1} \|x^0 - x^*\|_{\bar{\mathbf{L}}}^2.$$

527

□

### 528 B.3 Non-zero solution

529 For reminder in the most general case the problem has the form

$$f(x) = \frac{1}{n} \sum_{i=1}^n f_i(x), \quad f_i(x) \equiv \frac{1}{2} x^\top \mathbf{L}_i x - x^\top \mathbf{b}_i.$$

530 with gradient estimator

$$g^k = \frac{1}{n} \sum_{i=1}^n \mathbf{C}_i^k \nabla f_i(\mathbf{C}_i^k x^k) = \frac{1}{n} \sum_{i=1}^n \mathbf{C}_i^k (\mathbf{L}_i \mathbf{C}_i^k x^k - \mathbf{b}_i) = \overline{\mathbf{B}}^k x^k - \frac{1}{n} \sum_{i=1}^n \mathbf{C}_i^k \mathbf{b}_i. \quad (47)$$

531 **General calculations for estimator (26).** In the heterogeneous case the following sketch preconditioner is used

$$\tilde{\mathbf{C}}_i := \sqrt{n} \left[ \mathbf{L}_i^{-\frac{1}{2}} \right]_{\pi_i, \pi_i} e_{\pi_i} e_{\pi_i}^\top.$$

533 Then  $\mathbb{E} [\overline{\mathbf{B}}^k] = \mathbf{I}$  (calculation was done in Section B.1.1) and

$$\begin{aligned} \mathbb{E} [\overline{\mathbf{C}\mathbf{b}}] &= \frac{1}{n} \sum_{i=1}^n \mathbb{E} [\tilde{\mathbf{C}}_i^k \mathbf{b}_i] \\ &= \frac{1}{n} \sum_{i=1}^n \mathbb{E} \left[ \sqrt{n} [\mathbf{L}_i^{-\frac{1}{2}}]_{\pi_i, \pi_i} e_{\pi_i} e_{\pi_i}^\top \mathbf{b}_i \right] \\ &= \frac{1}{n} \sum_{i=1}^n \frac{1}{n} \sum_{j=1}^n \sqrt{n} [\mathbf{L}_i^{-\frac{1}{2}}]_{j,j} e_j [\mathbf{b}_i]_j \\ &= \frac{1}{n} \sum_{i=1}^n \frac{1}{n} \sqrt{n} \mathbf{D}_i^{-\frac{1}{2}} \mathbf{b}_i \\ &= \frac{1}{\sqrt{n}} \frac{1}{n} \sum_{i=1}^n \mathbf{D}_i^{-\frac{1}{2}} \mathbf{b}_i \\ &= \frac{1}{\sqrt{n}} \underbrace{\overline{\mathbf{D}^{-\frac{1}{2}} \mathbf{b}}}_{\overline{\mathbf{D} \mathbf{b}}} \end{aligned}$$

### 534 B.3.1 Generic convergence analysis for heterogeneous case: proof of Theorem 2.

535 Here we formulate and prove a bit more general version of Theorem 2, which is obtained as a special  
536 case of the next result for  $c = 1/2$ .

537 **Theorem 3.** Consider the method (2) with estimator (26) for a quadratic problem (12) with positive  
538 definite matrix  $\overline{\mathbf{L}} \succ 0$ . Then if for every  $\mathbf{D}_i := \text{Diag}(\mathbf{L}_i)$  matrices  $\mathbf{D}_i^{-\frac{1}{2}}$  exist, scaled  
539 permutation sketches  $\mathbf{C}_i := \sqrt{n} [\mathbf{L}_i^{-\frac{1}{2}}]_{\pi_i, \pi_i} e_{\pi_i} e_{\pi_i}^\top$  are used and heterogeneity is bounded as  
540  $\mathbb{E} [\|g^k - \mathbb{E} [g^k]\|_{\overline{\mathbf{L}}}^2] \leq \sigma^2$ . Then for step size is chosen as

$$0 < \gamma \leq \gamma_{c,\beta} := \frac{1 - c - \beta}{\beta + 1/2}, \quad (48)$$

541 where  $\gamma_{c,\beta} \in (0, 1]$  for  $\beta + c < 1$ , the iterates satisfy

$$\frac{1}{K} \sum_{k=0}^{K-1} \mathbb{E} [\|\nabla f(x^k)\|_{\overline{\mathbf{L}}^{-1}}^2] \leq \frac{f(x^0) - \mathbb{E} [f(x^K)]}{c\gamma K} + \left( \frac{1 - \gamma}{c\beta} + \frac{\gamma}{2c} \right) \|h\|_{\overline{\mathbf{L}}}^2 + \frac{\gamma}{2c} \sigma^2. \quad (49)$$

542 where  $\overline{\mathbf{L}} = \frac{1}{n} \sum_{i=1}^n \mathbf{L}_i$ ,  $h = \overline{\mathbf{L}}^{-1} \overline{\mathbf{b}} - \frac{1}{\sqrt{n}} \frac{1}{n} \sum_{i=1}^n \mathbf{D}_i^{-\frac{1}{2}} \mathbf{b}_i$  and  $\overline{\mathbf{b}} = \frac{1}{n} \sum_{i=1}^n \mathbf{b}_i$ .

543 *Proof.* By using  $\mathbf{L}$ -smoothness

$$\begin{aligned}
\mathbb{E} [f(x^{k+1}) \mid x^k] &\stackrel{(8)}{\leq} f(x^k) - \gamma \langle \nabla f(x^k), \mathbb{E} [g^k] \rangle + \frac{\gamma^2}{2} \mathbb{E} [\|g^k\|_{\mathbf{L}}^2] \\
&\stackrel{(27),(38)}{=} f(x^k) - \gamma \langle \nabla f(x^k), \bar{\mathbf{L}}^{-1} \nabla f(x^k) + h \rangle \\
&\quad + \frac{\gamma^2}{2} (\|\mathbb{E} [g^k]\|_{\mathbf{L}}^2 + \mathbb{E} [\|g^k - \mathbb{E} [g^k]\|_{\mathbf{L}}^2]) \\
&\stackrel{(27)}{=} f(x^k) - \gamma (\langle \nabla f(x^k), \bar{\mathbf{L}}^{-1} \nabla f(x^k) \rangle + \langle \nabla f(x^k), h \rangle) \\
&\quad + \frac{\gamma^2}{2} (\|\bar{\mathbf{L}}^{-1} \nabla f(x^k) + h\|_{\mathbf{L}}^2 + \mathbb{E} [\|g^k - \mathbb{E} [g^k]\|_{\mathbf{L}}^2]) \\
&\stackrel{(37)}{=} f(x^k) - \gamma (\|\nabla f(x^k)\|_{\bar{\mathbf{L}}^{-1}}^2 + \langle \nabla f(x^k), h \rangle) + \frac{\gamma^2}{2} \mathbb{E} [\|g^k - \mathbb{E} [g^k]\|_{\mathbf{L}}^2] \\
&\quad + \frac{\gamma^2}{2} (\|\nabla f(x^k)\|_{\bar{\mathbf{L}}^{-1}}^2 + 2 \langle \nabla f(x^k), h \rangle + \|h\|_{\mathbf{L}}^2) \\
&\leq f(x^k) - \gamma (1 - \gamma/2) \|\nabla f(x^k)\|_{\bar{\mathbf{L}}^{-1}}^2 + \frac{\gamma^2}{2} \sigma^2 \\
&\quad - \gamma (1 - \gamma) \langle \nabla f(x^k), h \rangle + \frac{\gamma^2}{2} \|h\|_{\mathbf{L}}^2,
\end{aligned}$$

544 where the last inequality follows from the grouping of similar terms and bounded heterogeneity

$$\mathbb{E} [\|g^k - \mathbb{E} [g^k]\|_{\mathbf{L}}^2] = \mathbb{E} \left[ \left\| g^k - (\bar{\mathbf{L}}^{-1} \nabla f(x^k) + h) \right\|_{\mathbf{L}}^2 \right] \quad (50)$$

$$= \mathbb{E} \left[ \left\| \bar{\mathbf{B}}^k x^k - \bar{\mathbf{C}} \bar{\mathbf{b}} - \left( x^k - \frac{1}{\sqrt{n}} \widetilde{\mathbf{D}} \bar{\mathbf{b}} \right) \right\|_{\mathbf{L}}^2 \right] \leq \sigma^2. \quad (51)$$

545 Next by using a Fenchel-Young inequality (39) for  $\langle \nabla f(x^k), -h \rangle$  and  $1 - \gamma \geq 0$

$$\begin{aligned}
\mathbb{E} [f(x^{k+1}) \mid x^k] &\leq f(x^k) - \gamma (1 - \gamma/2) \|\nabla f(x^k)\|_{\bar{\mathbf{L}}^{-1}}^2 + \frac{\gamma^2}{2} (\|h\|_{\mathbf{L}}^2 + \sigma^2) \\
&\quad + \gamma (1 - \gamma) \left[ \beta \|\nabla f(x^k)\|_{\bar{\mathbf{L}}^{-1}}^2 + 0.25 \beta^{-1} \|h\|_{\mathbf{L}}^2 \right] \\
&\leq f(x^k) - \gamma (1 - \gamma/2 - \beta (1 - \gamma)) \|\nabla f(x^k)\|_{\bar{\mathbf{L}}^{-1}}^2 \\
&\quad + \gamma \left\{ \left( \beta^{-1} (1 - \gamma) + \frac{\gamma}{2} \right) \|h\|_{\mathbf{L}}^2 + \frac{\gamma}{2} \sigma^2 \right\}, \quad (52)
\end{aligned}$$

546 where in the last inequality we grouped similar terms and used the fact that  $0.25 < 1$ .

547 Now to guarantee that  $1 - \gamma/2 - \beta(1 - \gamma) \geq c > 0$  we choose the step size as

$$0 < \gamma \leq \gamma_{c,\beta} := \frac{1 - c - \beta}{\beta + 1/2}, \quad (53)$$

548 where  $\gamma_{c,\beta} > 0$  for  $\beta + c < 1$ . This means that  $\beta$  can not arbitrary grow to diminish  $\beta^{-1}$ .

549 Then after standard manipulations and unrolling the recursion

$$\gamma c \|\nabla f(x^k)\|_{\bar{\mathbf{L}}^{-1}}^2 \leq f(x^k) - \mathbb{E} [f(x^{k+1}) \mid x^k] + \gamma (\beta^{-1} (1 - \gamma) + \gamma/2) \|h\|_{\mathbf{L}}^2 + \frac{\gamma^2}{2} \sigma^2 \quad (54)$$

550 we obtain

$$\frac{c}{K} \sum_{k=0}^{K-1} \mathbb{E} [\|\nabla f(x^k)\|_{\bar{\mathbf{L}}^{-1}}^2] \leq \frac{f(x^0) - \mathbb{E} [f(x^K)]}{\gamma K} + (\beta^{-1} (1 - \gamma) + \gamma/2) \|h\|_{\mathbf{L}}^2 + \frac{\gamma}{2} \sigma^2. \quad (55)$$

551

□

### 552 B.3.2 Homogeneous case

553 The main difference to the result in the previous Subsection is that gradient estimator expression (31)  
 554 holds deterministically (without expectation  $\mathbb{E}$ ). That is why  $g^k = \mathbb{E}[g^k]$  and heterogeneity term  $\sigma^2$   
 555 equals to 0.

556 We provide the full statement and proof for the homogeneous result discussed in 4.2.

557 **Theorem 4.** Consider the method (2) with estimator (31) for a homogeneous quadratic problem (12)  
 558 with positive definite matrix  $\mathbf{L}_i \equiv \mathbf{L} \succ 0$ . Then if exists  $\mathbf{D}^{-\frac{1}{2}}$  for  $\mathbf{D} := \text{Diag}(\mathbf{L})$ , scaled permutation  
 559 sketch  $\mathbf{C}'_i = \sqrt{n}e_{\pi_i}e_{\pi_i}^\top$  is used and the step size is chosen as

$$0 < \gamma \leq \gamma_{c,\beta} := \frac{1 - c - \beta}{\beta + 1/2}, \quad (56)$$

560 where  $\gamma_{c,\beta} > 0$  for  $\beta + c < 1$ . Then the iterates satisfy

$$\frac{1}{K} \sum_{k=0}^{K-1} \mathbb{E} [\|\nabla f(x^k)\|_{\tilde{\mathbf{L}}^{-1}}^2] \leq \frac{f(x^0) - \mathbb{E}[f(x^K)]}{c\gamma K} + \left( \frac{1-\gamma}{c\beta} + \frac{\gamma}{2c} \right) \|h\|_{\tilde{\mathbf{L}}}^2, \quad (57)$$

561 where  $\tilde{\mathbf{L}} = \mathbf{D}^{-\frac{1}{2}}\mathbf{L}\mathbf{D}^{-\frac{1}{2}}$ ,  $h = \tilde{\mathbf{L}}^{-1}\tilde{\mathbf{b}} - \frac{1}{\sqrt{n}}\tilde{\mathbf{b}}$  and  $\tilde{\mathbf{b}} = \mathbf{D}^{-\frac{1}{2}}\mathbf{b}$ .

562 *Proof.* By using  $\mathbf{L}$ -smoothness

$$\begin{aligned} \mathbb{E}[f(x^k - \gamma g^k) | x^k] &\stackrel{(8)}{\leq} f(x^k) - \langle \nabla f(x^k), \gamma \mathbb{E}[g^k] \rangle + \frac{\gamma^2}{2} \mathbb{E}[\|g^k\|_{\tilde{\mathbf{L}}}^2] \\ &\leq f(x^k) - \gamma \langle \nabla f(x^k), \tilde{\mathbf{L}}^{-1} \nabla f(x^k) + h \rangle + \frac{\gamma^2}{2} \|\tilde{\mathbf{L}}^{-1} \nabla f(x^k) + h\|_{\tilde{\mathbf{L}}}^2 \\ &\stackrel{(37)}{=} f(x^k) - \gamma \left( \langle \nabla f(x^k), \tilde{\mathbf{L}}^{-1} \nabla f(x^k) \rangle + \langle \nabla f(x^k), h \rangle \right) \\ &\quad + \frac{\gamma^2}{2} \left( \|\nabla f(x^k)\|_{\tilde{\mathbf{L}}^{-1}}^2 + 2 \langle \nabla f(x^k), h \rangle + \|h\|_{\tilde{\mathbf{L}}}^2 \right) \\ &= f(x^k) - \gamma(1 - \gamma/2) \|\nabla f(x^k)\|_{\tilde{\mathbf{L}}^{-1}}^2 + \frac{\gamma^2}{2} \|h\|_{\tilde{\mathbf{L}}}^2 - \gamma(1 - \gamma) \langle \nabla f(x^k), h \rangle \end{aligned}$$

563 Next by using a Fenchel-Young inequality (39) for  $\langle \nabla f(x^k), -h \rangle$  and  $1 - \gamma \geq 0$

$$\begin{aligned} \mathbb{E}[f(x^{k+1}) | x^k] &\leq f(x^k) - \gamma(1 - \gamma/2) \|\nabla f(x^k)\|_{\tilde{\mathbf{L}}^{-1}}^2 + \frac{\gamma^2}{2} \|h\|_{\tilde{\mathbf{L}}}^2 \\ &\quad + \gamma(1 - \gamma) \left[ \beta \|\nabla f(x^k)\|_{\tilde{\mathbf{L}}^{-1}}^2 + 0.25\beta^{-1} \|h\|_{\tilde{\mathbf{L}}}^2 \right] \\ &= f(x^k) - \gamma(1 - \gamma/2 - \beta(1 - \gamma)) \|\nabla f(x^k)\|_{\tilde{\mathbf{L}}^{-1}}^2 \\ &\quad + \gamma(\beta^{-1}(1 - \gamma) + \gamma/2) \|h\|_{\tilde{\mathbf{L}}}^2. \end{aligned}$$

564 Now to guarantee that  $1 - \gamma/2 - \beta(1 - \gamma) \geq c > 0$  we choose the step size as

$$0 < \gamma \leq \gamma_{c,\beta} := \frac{1 - c - \beta}{\beta + 1/2}, \quad (58)$$

565 where  $\gamma_{c,\beta} \geq 0$  for  $\beta + c < 1$ .

566 Then after standard manipulations and unrolling the recursion

$$\gamma c \|\nabla f(x^k)\|_{\tilde{\mathbf{L}}^{-1}}^2 \leq f(x^k) - \mathbb{E}[f(x^{k+1}) | x^k] + \gamma(\beta^{-1}(1 - \gamma) + \gamma/2) \|h\|_{\tilde{\mathbf{L}}}^2 \quad (59)$$

567 we obtain the formulated result

$$\frac{c}{K} \sum_{k=0}^{K-1} \mathbb{E} [\|\nabla f(x^k)\|_{\tilde{\mathbf{L}}^{-1}}^2] \leq \frac{f(x^0) - \mathbb{E}[f(x^K)]}{\gamma K} + (\beta^{-1}(1 - \gamma) + \gamma/2) \|h\|_{\tilde{\mathbf{L}}}^2. \quad (60)$$

568  $\square$

569 **Remark 2. 1)** The first term in the convergence upper bound (57) is minimized by maximizing  
 570 product  $c \cdot \gamma$ , which motivates to choose  $c > 0$  and  $\gamma \leq 1$  as big as possible. Although due to the  
 571 constraint on the step size (and  $\beta > 0$ )

$$0 < \gamma \leq \gamma_{c,\beta} := \frac{1 - c - \beta}{\beta + 1/2}, \quad (61)$$

572 constant  $c \in (0, 1)$ . So, by maximizing  $c$  the value  $\gamma_{c,\beta}$  becomes smaller, thus there is a trade-off.

573 **2)** The second term or the neighborhood size (multiplier in front of  $\|h\|_{\tilde{\mathbf{L}}}^2$ )

$$\Psi(\beta, \gamma) := \frac{\beta^{-1}(1 - \gamma) + \gamma/2}{c} = \frac{\beta^{-1}(1 - \gamma) + \gamma/2}{1 - \gamma/2 - \beta(1 - \gamma)} \quad (62)$$

574 can be numerically minimized (e.g. by using WolframAlpha) with constraints  $\gamma \in (0, 1]$  and  $\beta > 0$ .  
 575 The solution of such optimization problem is  $\gamma^* \approx 1$  and  $\beta^* \approx \xi \in \{3.992, 2.606, 2.613\}$ . In fact,  
 576  $\Psi(\beta^*, \gamma^*) \approx 0.5$ .

577 **Functional gap convergence.** Note that for quadratic optimization problem (12)

$$\|\nabla f(x^k)\|_{\tilde{\mathbf{L}}^{-1}}^2 = \left\langle \tilde{\mathbf{L}} x^k - \tilde{\mathbf{b}}, \tilde{\mathbf{L}}^{-1} (\tilde{\mathbf{L}} x^k - \tilde{\mathbf{b}}) \right\rangle = 2(f(x^k) - f(x^*)). \quad (63)$$

578 Then by rearranging and subtracting  $f^* := f(x^*)$  from both sides of inequality (59) we obtain

$$\begin{aligned} \mathbb{E}[f(x^{k+1}) | x^k] - f^* &\leq f(x^k) - f^* - \gamma c \|\nabla f(x^k)\|_{\tilde{\mathbf{L}}^{-1}}^2 + \gamma(\beta^{-1}(1 - \gamma) + \gamma/2) \|h\|_{\tilde{\mathbf{L}}}^2 \\ &\stackrel{(63)}{=} (f(x^k) - f^*) - \gamma c \cdot 2(f(x^k) - f^*) + \gamma(\beta^{-1}(1 - \gamma) + \gamma/2) \|h\|_{\tilde{\mathbf{L}}}^2 \\ &= (1 - 2\gamma c)(f(x^k) - f^*) + \gamma(\beta^{-1}(1 - \gamma) + \gamma/2) \|h\|_{\tilde{\mathbf{L}}}^2. \end{aligned}$$

579 After unrolling the recursion

$$\begin{aligned} \mathbb{E}[f(x^{k+1}) | x^k] - f^* &\leq (1 - 2\gamma c)^k (f(x^0) - f^*) + \gamma(\beta^{-1}(1 - \gamma) + \gamma/2) \|h\|_{\tilde{\mathbf{L}}}^2 \sum_{i=0}^k (1 - 2\gamma c)^i \\ &\leq (1 - 2\gamma c)^k (f(x^0) - f^*) + \frac{1}{2c} (\beta^{-1}(1 - \gamma) + \gamma/2) \|h\|_{\tilde{\mathbf{L}}}^2. \end{aligned}$$

580 This result is formalized in the following Theorem.

581 **Theorem 5.** Consider the method (2) with estimator (31) for a homogeneous quadratic problem (12)  
 582 with positive definite matrix  $\mathbf{L}_i \equiv \mathbf{L} \succ 0$ . Then if exists  $\mathbf{D}^{-\frac{1}{2}}$  for  $\mathbf{D} := \text{Diag}(\mathbf{L})$ , scaled permutation  
 583 sketch  $\mathbf{C}'_i = \sqrt{n} e_{\pi_i} e_{\pi_i}^\top$  is used and the step size is chosen as

$$0 < \gamma \leq \gamma_{c,\beta} := \frac{1 - c - \beta}{\beta + 1/2}, \quad (64)$$

584 where  $\gamma_{c,\beta} > 0$  for  $\beta + c < 1$ . Then the iterates satisfy

$$\mathbb{E}[f(x^k)] - f^* \leq (1 - 2\gamma c)^k (f(x^0) - f^*) + \frac{1}{2c} (\beta^{-1}(1 - \gamma) + \gamma/2) \|h\|_{\tilde{\mathbf{L}}}^2, \quad (65)$$

585 where  $h = \tilde{\mathbf{L}}^{-1} \tilde{\mathbf{b}} - \frac{1}{\sqrt{n}} \tilde{\mathbf{b}}$  and  $\tilde{\mathbf{L}} = \mathbf{D}^{-\frac{1}{2}} \mathbf{L} \mathbf{D}^{-\frac{1}{2}}$ ,  $\tilde{\mathbf{b}} = \mathbf{D}^{-\frac{1}{2}} \mathbf{b}$ .

586 This result shows that for a proper choice of the step size  $\gamma = 1$  and constant  $c = 1/2$ , the functional  
 587 gap can converge in basically 1 iteration to the neighborhood of size

$$\|h\|_{\tilde{\mathbf{L}}}^2 = \left\langle \tilde{\mathbf{L}} \left( \tilde{\mathbf{L}}^{-1} \tilde{\mathbf{b}} - \frac{1}{\sqrt{n}} \tilde{\mathbf{b}} \right), \tilde{\mathbf{L}}^{-1} \tilde{\mathbf{b}} - \frac{1}{\sqrt{n}} \tilde{\mathbf{b}} \right\rangle,$$

588 which equals to zero if  $\tilde{\mathbf{L}}^{-1} \tilde{\mathbf{b}} = \frac{1}{\sqrt{n}} \tilde{\mathbf{b}}$ . This condition is the same as the one we obtained at the end  
 589 of Subsection 4.2 with asymptotic analysis of the iterates in the homogeneous case.

590 **Discussion of the trace.** Consider a positive definite  $\mathbf{L} \succ 0$  such that  $\exists \mathbf{D}^{-\frac{1}{2}}$ . Thus  $\tilde{\mathbf{L}} =$   
591  $\mathbf{D}^{-\frac{1}{2}} \mathbf{L} \mathbf{D}^{-\frac{1}{2}}$  has only ones on the diagonal and  $\text{tr}(\tilde{\mathbf{L}}) = n$ . Then

$$n \cdot \text{tr}(\tilde{\mathbf{L}}^{-1}) = \text{tr}(\tilde{\mathbf{L}}) \text{tr}(\tilde{\mathbf{L}}^{-1}) = (\lambda_1 + \dots + \lambda_n) \left( \frac{1}{\lambda_1} + \dots + \frac{1}{\lambda_n} \right) \geq n^2,$$

592 where the last inequality is due to the relation between harmonic and arithmetic means. Therefore  
593  $\text{tr}(\tilde{\mathbf{L}}^{-1}) = \lambda_1^{-1} + \dots + \lambda_n^{-1} \geq n$  and sum of  $\tilde{\mathbf{L}}^{-1}$  eigenvalues has to be greater than  $n$ .

#### 594 **B.4 Generalization to $n \neq d$ case.**

595 Our results can be generalized in a similar way as in [40].

596 **1)**  $d = qn$ , for integer  $q \geq 1$ . Let  $\pi = (\pi_1, \dots, \pi_d)$  be a random permutation of  $\{1, \dots, d\}$ . Then for  
597 each  $i \in \{1, \dots, n\}$  define

$$\mathbf{C}'_i := \sqrt{n} \cdot \sum_{j=q(i-1)+1}^{qi} e_{\pi_j} e_{\pi_j}^\top. \quad (66)$$

598 Matrix  $\mathbb{E}[\bar{\mathbf{B}}^k]$  for the homogeneous preconditioned case can be computed the following way

$$\begin{aligned} \mathbb{E}[\bar{\mathbf{B}}^k] &= \mathbb{E} \left[ \frac{1}{n} \sum_{i=1}^n \mathbf{C}'_i \tilde{\mathbf{L}} \mathbf{C}'_i \right] \\ &= \frac{1}{n} \sum_{i=1}^n \mathbb{E} \left[ \sum_{j=q(i-1)+1}^{qi} n e_{\pi_j} e_{\pi_j}^\top \tilde{\mathbf{L}} e_{\pi_j} e_{\pi_j}^\top \right] \\ &= \sum_{i=1}^n \sum_{j=q(i-1)+1}^{qi} \mathbb{E} \left[ e_{\pi_j} e_{\pi_j}^\top \tilde{\mathbf{L}} e_{\pi_j} e_{\pi_j}^\top \right] \\ &= \sum_{i=1}^n \sum_{j=q(i-1)+1}^{qi} \frac{1}{d} \sum_{l=1}^d e_l e_l^\top \tilde{\mathbf{L}} e_l e_l^\top \\ &= \sum_{i=1}^n \sum_{j=q(i-1)+1}^{qi} \frac{1}{d} \text{Diag}(\tilde{\mathbf{L}}) \\ &= n \frac{q}{d} \text{Diag}(\tilde{\mathbf{L}}) \\ &= \text{Diag}(\tilde{\mathbf{L}}) \\ &= \mathbf{I}. \end{aligned}$$

599 As for the linear term

$$\begin{aligned} \mathbb{E}[\mathbf{C}' \mathbf{b}] &= \mathbb{E} \left[ \frac{1}{n} \sum_{i=1}^n \mathbf{C}'_i \tilde{\mathbf{b}} \right] = \frac{1}{n} \sum_{i=1}^n \mathbb{E} \left[ \sum_{j=q(i-1)+1}^{qi} \sqrt{n} e_{\pi_j} e_{\pi_j}^\top \tilde{\mathbf{b}} \right] \\ &= \frac{1}{\sqrt{n}} \sum_{i=1}^n \sum_{j=q(i-1)+1}^{qi} \frac{1}{d} \mathbf{I} \tilde{\mathbf{b}} = \frac{\sqrt{n}q}{d} \mathbf{I} \tilde{\mathbf{b}} = \frac{1}{\sqrt{n}} \tilde{\mathbf{b}}. \end{aligned}$$

600 **2)**  $n = qd$ , for integer  $q \geq 1$ . Define the multiset  $S := \{1, \dots, 1, 2, \dots, 2, \dots, d, \dots, d\}$ , where  
601 each number occurs precisely  $q$  times. Let  $\pi = (\pi_1, \dots, \pi_n)$  be a random permutation of  $S$ . Then  
602 for each  $i \in \{1, \dots, n\}$  define

$$\mathbf{C}'_i := \sqrt{d} \cdot e_{\pi_i} e_{\pi_i}^\top. \quad (67)$$



$$\begin{aligned}
\mathbb{E} [\bar{\mathbf{B}}^k] &= \mathbb{E} \left[ \frac{1}{n} \sum_{i=1}^n \mathbf{C}'_i \tilde{\mathbf{L}} \mathbf{C}'_i \right] = \frac{1}{n} \sum_{i=1}^n \mathbb{E} \left[ d e_{\pi_i} e_{\pi_i}^\top \tilde{\mathbf{L}} e_{\pi_i} e_{\pi_i}^\top \right] \\
&= \frac{1}{n} \sum_{i=1}^n \frac{1}{d} \sum_{j=1}^d d e_j e_j^\top \tilde{\mathbf{L}} e_j e_j^\top = \frac{1}{n} \sum_{i=1}^n \text{Diag}(\tilde{\mathbf{L}}) = \mathbf{I}.
\end{aligned}$$

603 The linear term

$$\mathbb{E} [\mathbf{C}' \mathbf{b}] = \mathbb{E} \left[ \frac{1}{n} \sum_{i=1}^n \mathbf{C}'_i \tilde{\mathbf{b}} \right] = \frac{1}{n} \sum_{i=1}^n \mathbb{E} \left[ \sqrt{d} e_{\pi_i} e_{\pi_i}^\top \tilde{\mathbf{b}} \right] = \frac{\sqrt{d}}{n} \sum_{i=1}^n \frac{1}{d} \mathbf{I} \tilde{\mathbf{b}} = \frac{1}{\sqrt{d}} \tilde{\mathbf{b}}.$$

To sum up both cases, in a homogeneous preconditioned setting  $\mathbb{E} [\bar{\mathbf{B}}^k] = \mathbf{I}$  and

$$\mathbb{E} [\mathbf{C}' \mathbf{b}] = \mathbb{E} \left[ \frac{1}{n} \sum_{i=1}^n \mathbf{C}'_i \mathbf{b} \right] = \tilde{\mathbf{b}} / \sqrt{\min(n, d)}.$$

604 Similar modifications and calculations can be done for heterogeneous scenario. The case when  $n$   
605 does not divide  $d$  and vice versa is generalized using constructions from [40].

## 606 C Comparison to previous related works

607 **Overview of theory provided in the original IST work [45].** They consider the following method

$$x^{k+1} = \mathcal{C}(x^k) - \gamma \nabla f_{i_k}(\mathcal{C}(x^k)), \quad (68)$$

608 where  $[\mathcal{C}(x)]_i = x_i \cdot \mathcal{B}e(p)^4$  is Bernoulli sparsifier and  $i_k$  is sampled uniformly at random from  $[n]$ .

609 Analysis in [45] relies on the assumptions

- 610 1.  $L_i$ -smoothness of individual losses  $f_i$ ;
- 611 2.  $Q$ -Lipschitz continuity of  $f$ :  $|f(x) - f(y)| \leq Q\|x - y\|$ ;
- 612 3. Error bound (or PL-condition):  $\|\nabla f(x)\| \geq \mu\|x^* - x\|$ , where  $x^*$  is the global optimum;
- 613 4. Stochastic gradient variance:  $\mathbb{E} [\|\nabla f_{i_k}(x)\|^2] \leq M + M_f \|\nabla f(x)\|^2$ ;
- 614 5.  $\mathbb{E} [\nabla f_{i_k}(\mathcal{C}(x^k)) | x^k] = \nabla f(x^k) + \varepsilon$ ,  $\|\varepsilon\| \leq B$ .

615 Convergence result [45, Theorem 1] for step size  $\gamma = 1/(2L_{\max})$ :

$$\min_{k \in \{1, \dots, K\}} \mathbb{E} [\|\nabla f(x^k)\|^2] \leq \frac{f(x^0) - f(x^*)}{\alpha(K+1)} + \frac{1}{\alpha} \cdot \left( \frac{BQ}{2L_{\max}} + \frac{5L_{\max}\omega}{2} \|x^*\|^2 + \frac{M}{4L_{\max}} \right), \quad (69)$$

616 where  $\alpha := \frac{1}{2L_{\max}} \left( 1 - \frac{M_f}{2} \right) - \frac{5\omega L_{\max}}{2\mu^2}$ ,  $\omega := \frac{1}{p} - 1 < \frac{\mu^2}{10L_{\max}^2}$ , and  $L_{\max} := \max_i L_i$ .

617 If Lipschitzness and Assumption 5 is replaced with *norm condition*:

$$\|\mathbb{E} [\nabla f_{i_k}(\mathcal{C}(x^k)) | x^k] - \nabla f(x^k)\| \leq \theta \|\nabla f(x^k)\| \quad (70)$$

618 they obtain the following (for step size  $\gamma = 1/2L_{\max}$ )

$$\min_{k \in \{1, \dots, K\}} \mathbb{E} [\|\nabla f(x^k)\|^2] \leq \frac{f(x^0) - f(x^*)}{\alpha(K+1)} + \frac{1}{\alpha} \cdot \left( \frac{5L_{\max}\omega}{2} \|x^*\|^2 + \frac{M}{4L_{\max}} \right), \quad (71)$$

619 where  $\alpha = \frac{1}{2L_{\max}} \left( \frac{1}{2} - \theta - \frac{M_f}{2} \right) - \frac{5\omega L_{\max}}{2\mu^2}$  and  $\omega = \frac{1}{p} - 1 < \frac{\mu^2}{5L_{\max}^2 \left( \frac{1}{2} - \theta - \frac{M_f}{2} \right)}$ .

---

$^4 \mathcal{B}_p(x) := \begin{cases} x/p & \text{with probability } p \\ 0 & \text{with probability } 1-p \end{cases}$

**Remark 3.** The method (68) does not incorporate gradient sparsification, which can create a significant disparity between theory and practice. This is because the gradient computed at the compressed model, denoted as  $\nabla f(\mathcal{C}(x))$ , is not guaranteed to be sparse and representative of submodel computations. Such modification of the method also significantly simplifies theoretical analysis, as using a single sketch (instead of CLC) allows for an unbiased gradient estimator.

Through our analysis of the IST gradient estimator in Equation (31), we discover that conditions, such as Assumption 5, are not satisfied even in the homogeneous setting for a simple quadratic problem. Furthermore, it is evident that such conditions are also not met for logistic loss. At the same time, in general, it is expected that insightful theory for general (non-)convex functions should yield appropriate results for quadratic problems. Additionally, it remains unclear whether the norm condition (70) is satisfied in practical scenarios, as even for quadratic problems, the situation is not straightforward, as we show in the expression for  $\sigma^2$  in (50).

**Masked training [33].** The authors consider the following “Partial SGD” method

$$\begin{aligned}\hat{x}^k &= x^k + \delta x^k = x^k - (1 - p) \odot x^k \\ x^{k+1} &= x^k - \gamma p \odot \nabla f(\hat{x}^k, \xi^k),\end{aligned}\tag{72}$$

where  $\nabla f(x, \xi)$  is an unbiased stochastic gradient estimator of an  $L$ -smooth loss function  $f$ ,  $\odot$  is an element-wise product, and  $p$  is a binary sparsification mask.

They make the following “bounded perturbation” assumption

$$\max_k \frac{\|\delta x^k\|}{\max\{\|p^k \odot \nabla f(x^k)\|, \|p^k \odot \nabla f(\hat{x}^k)\|\}} \leq \frac{1}{2L}.\tag{73}$$

This assumption may not hold for a simple convex case. Consider a quadratic function  $f(x) = \frac{1}{2}x^\top A x$ , for

$$A = \begin{pmatrix} a & 0 \\ 0 & c \end{pmatrix}, \quad x^0 = \begin{pmatrix} x_1 \\ x_2 \end{pmatrix}, \quad p^0 = \begin{pmatrix} 0 \\ 1 \end{pmatrix}.\tag{74}$$

Then condition (73) (at iteration  $k = 0$ ) will be equivalent to

$$\frac{x_1}{cx_2} \leq \frac{1}{2a} \Leftrightarrow 2 \leq \frac{2a}{c} \leq \frac{x_2}{x_1},$$

which clearly does not hold for an arbitrary initialization  $x^0$ .

In addition, convergence bound in [33, Theorem 1] suggests choosing the step size as  $\gamma_0 \alpha^k$ , where

$$\alpha^k = \min \left\{ 1, \frac{\langle p^k \odot \nabla f(x^k), p^k \odot \nabla f(\hat{x}^k) \rangle}{\|p^k \odot \nabla f(\hat{x}^k)\|^2} \right\}\tag{75}$$

is not guaranteed to be positive to the inner product  $\langle p^k \odot \nabla f(x^k), p^k \odot \nabla f(\hat{x}^k) \rangle$ , which may lead to non-convergence of the method.

**Optimization with access to auxiliary information framework [7]** suggests modeling training with compressed models via performing gradient steps with respect to function  $h(x) := \mathbb{E}_{\mathcal{M}} [f(1_{\mathcal{M}} \odot x)]$ . This function allows access to sparse/low-rank version of the original model  $f(x)$ . They impose the following bounded hessian dissimilarity assumption on  $h$  and  $f$

$$\|\nabla^2 f(x) - \mathbb{E}_{\mathcal{M}} [\mathbf{D}_{\mathcal{M}} \nabla^2 f(1_{\mathcal{M}} \odot x) \mathbf{D}_{\mathcal{M}}]\|_2 \leq \delta,\tag{76}$$

where  $1_{\mathcal{M}}$  and  $\mathbf{D}_{\mathcal{M}} = \text{Diag}(1_{\mathcal{M}})$  refer to binary vector and matrix sparsification masks.

This approach relies on variance-reduction and requires gradient computations on the full model  $x$ . That is why it is not suitable for our problem setting.

## 650 D Experiments

To empirically validate our theoretical framework and its implications, we focus on carefully controlled settings that satisfy the assumptions of our work. Specifically, we consider a quadratic problem defined in (12). For reminder, the local loss function is defined as

$$f_i(x) = x^\top \mathbf{L}_i x - x^\top \mathbf{b}_i,$$

651 where  $\mathbf{L}_i = \mathbf{B}_i^\top \mathbf{B}_i$ . Entries of the matrices  $\mathbf{B}_i \in \mathbb{R}^{d \times d}$ , vectors  $\mathbf{b}_i \in \mathbb{R}^d$ , and initialization  $x^0 \in \mathbb{R}^d$   
 652 are generated from a standard Gaussian distribution  $\mathcal{N}(0, 1)$ .

653 In Figure 1a, we present the performance of the simplified Independent Subnetwork Training (IST)  
 654 algorithm (update (2) with estimator (26)) for a heterogeneous problem. We fix the dimension  
 655  $d$  to 1000 and the number of computing nodes  $n$  to 10. We evaluate the logarithm of a relative  
 656 functional error  $\log(f(x^k) - f(x^*)/f(x^0) - f(x^*))$ , while the horizontal axis denotes the number  
 657 of communication rounds required to achieve a certain error tolerance. According to our theory (65),  
 658 the method converges to a neighborhood of the solution, which depends on the chosen step size.  
 659 Specifically, a larger step size allows for faster convergence but results in a larger neighborhood.

660 In Figure 1b, we demonstrate the convergence of the iterates  $x^k$  for a homogeneous problem with  
 661  $d = n = 50$ . The results are in close agreement with our theoretical predictions for the estimator (31).  
 662 We observe that the distance to the method's expected fixed point  $x^\infty = \tilde{\mathbf{b}}/\sqrt{n}$  decreases linearly for  
 663 different step size values. This confirms that IST may converge not the optimal solution  $x^* = \tilde{\mathbf{L}}^{-1} \tilde{\mathbf{b}}$   
 664 of the original problem (12) in general (no interpolation) case.

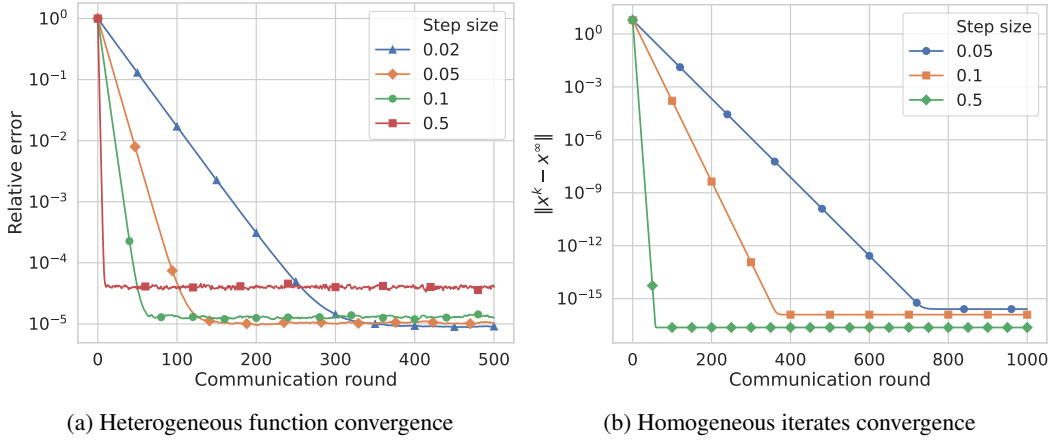

Figure 1: Different step size values

665 Simulations were performed on a machine with 24 Intel(R) Xeon(R) Gold 6246 CPU @ 3.30 GHz.
